# Supplementary material for: The Aspergillus nidulans MAPK Module AnSte11-Ste50-Ste7-Fus3 Controls Development and Secondary Metabolism
Source: PLoS Genet. 2012 Jul 19;8(7):e1002816. doi: 10.1371/journal.pgen.1002816 (PMC3400554; doi:10.1371/journal.pgen.1002816)
Supplement: Table S6 — SEQUEST Multiple Consensus Report of AnSte50 [SteD]::cTAP tag identifications after nano-LC-ESI-MS2. (XLS) [file pgen.1002816.s015.xls]

## Sheet: Bioworks
	Table S6. SEQUEST Multiple Consensus Report of AnSte50 [SteD]::cTAP tag identifications after nano-LC-ESI-MS2
	AnSte50 (SteD)::cTAP vegetative stage identifications
	Reference						P (pro)	Score	Coverage	MW	Accession	Peptide (Hits)
	Scan(s), File	Peptide	MH+	DeltaM	z	Type	P (pep)	XC	DeltaCn	Sp	RSp	Ions	Count
1	AN2269 | Aspergillus nidulans (AN2269.3) hypothetical protein similar to MAPKK kinase (translation) (887 aa)						8.88178e-15	270.316	41.9	97737.3	AN2269.3	245 (242 1 2 0 0)
	679, OB340	R.HSLLDENASVAATDGGSFNER.L	2190.01	-0.17164	2	CID	8.88178e-15	4.76741	0.619022	2119.61	1	24/40
	640, OB339	R.HSLLDENASVAATDGGSFNER.L	2190.01	-0.265598	2	CID	1.66533e-14	5.35511	0.67824	2349.61	1	26/40
	654, OB338	R.HSLLDENASVAATDGGSFNER.L	2190.01	-0.131127	2	CID	2.33924e-12	5.28553	0.676326	1893.43	1	24/40
	567, OB339	R.DSIASSSLHPLQEESPVEPNRK.S	2420.21	0.926602	3	CID	2.04958e-11	3.75941	0.599806	631.273	1	25/84
	582, OB338	R.DSIASSSLHPLQEESPVEPNRK.S	2420.21	1.18405	3	CID	4.91618e-11	3.05051	0.560294	732.228	1	27/84
	893, OB341	R.ANNFNGNNLIECDQK.I	1750.78	-0.433369	2	CID	9.1932e-11	3.20231	0.566176	1140.63	1	18/28
	608, OB340	R.DSIASSSLHPLQEESPVEPNRK.S	2420.21	1.3862	3	CID	1.04037e-10	3.73582	0.58268	599.565	1	26/84
	563, OB339	R.DSIASSSLHPLQEESPVEPNRK.S	2420.21	0.422329	3	CID	1.44438e-10	3.89414	0.615839	632.426	1	25/84
	602, OB340	K.SYVSFDSGSDDPNNSR.H	1746.72	-0.299622	2	CID	1.88859e-10	3.20109	0.632947	1436.84	1	21/30
	682, OB340	R.HSLLDENASVAATDGGSFNER.L	2190.01	-0.242987	2	CID	1.91672e-10	4.55976	0.593025	2332.36	1	27/40
	662, OB341_110528183951	K.SEFSEADDGLDAVR.S	1510.67	-0.313647	2	CID	2.71504e-10	2.99811	0.542864	1963.94	1	21/26
	869, OB341	R.DSIASSSLHPLQEESPVEPNRK.S	2420.21	0.252041	3	CID	4.80456e-10	4.18637	0.693505	569.931	1	25/84
	568, OB339	K.SYVSFDSGSDDPNNSR.H	1746.72	-0.201925	2	CID	4.89596e-10	2.83644	0.522217	1665.03	1	20/30
	493, OB341_110528183951	R.QLAALEAAHQQASPDSAR.S	1863.93	-0.114329	2	CID	5.65586e-10	4.76448	0.670172	823.117	1	19/34
	607, OB340	K.SYVSFDSGSDDPNNSR.H	1746.72	-0.282878	2	CID	6.48277e-10	3.40914	0.643782	1179.38	1	18/30
	622, OB340	R.AAQLALDESQQAHMNALSSSNAR.N	2413.15	0.977762	3	CID	8.28365e-10	4.41055	0.569436	886.572	1	28/88
	678, OB340	R.HSLLDENASVAATDGGSFNER.L	2190.01	0.395195	3	CID	9.09356e-10	5.2335	0.544596	1733.69	1	29/80
	658, OB338	R.HSLLDENASVAATDGGSFNER.L	2190.01	-0.160455	2	CID	1.084e-09	4.41586	0.616504	1491.8	1	22/40
	587, OB339	R.AAQLALDESQQAHMNALSSSNAR.N	2413.15	1.22019	3	CID	1.6618e-09	3.60757	0.558754	906.323	1	30/88
	564, OB339	K.SYVSFDSGSDDPNNSR.H	1746.72	-0.231186	2	CID	1.78427e-09	3.12397	0.634263	1859.35	1	21/30
	1040, OB341	R.HSLLDENASVAATDGGSFNER.L	2190.01	-0.21181	2	CID	1.97244e-09	4.50788	0.654836	1358.1	1	21/40
	580, OB338	R.DSIASSSLHPLQEESPVEPNRK.S	2420.21	-0.241515	2	CID	2.28437e-09	3.2494	0.575319	419.731	1	16/42
	508, OB338	R.QLAALEAAHQQASPDSAR.S	1863.93	0.0427649	2	CID	2.55711e-09	4.56661	0.719981	698.717	1	20/34
	653, OB338	R.HSLLDENASVAATDGGSFNER.L	2190.01	0.638725	3	CID	2.62494e-09	5.66369	0.616916	2212.15	1	31/80
	1072, OB341	K.SEFSEADDGLDAVR.S	1510.67	-0.415493	2	CID	2.63455e-09	3.06991	0.515203	2390.78	1	23/26
	639, OB341_110528183951	R.HSLLDENASVAATDGGSFNER.L	2190.01	1.05254	3	CID	2.92853e-09	3.9218	0.494332	1860.33	1	31/80
	597, OB338	R.AAQLALDESQQAHMNALSSSNAR.N	2413.15	0.670145	3	CID	3.54091e-09	3.73563	0.596921	700.356	1	26/88
	519, OB342_110528200457	R.QLAALEAAHQQASPDSAR.S	1863.93	0.254098	2	CID	8.45695e-09	4.3178	0.610231	596.727	1	18/34
	1022, OB342	K.SEFSEADDGLDAVR.S	1510.67	-0.25602	2	CID	9.0324e-09	2.60338	0.471415	1042.23	1	17/26
	579, OB338	R.DSIASSSLHPLQEESPVEPNRK.S	2420.21	0.930996	3	CID	9.15733e-09	4.49416	0.616596	548.486	1	22/84
	488, OB341_110528183951	R.QLAALEAAHQQASPDSAR.S	1863.93	0.373286	3	CID	1.07911e-08	3.01548	0.583834	378.239	1	20/68
	997, OB340	R.DAPPIPSIADTWLNNGTPPTR.A	2233.12	1.21709	2	CID	1.18804e-08	2.87108	0.602806	323.387	1	19/40
	627, OB340	R.AAQLALDESQQAHMNALSSSNAR.N	2413.15	0.974832	3	CID	1.31787e-08	2.93496	0.48223	953.37	1	29/88
	702, OB340	K.SEFSEADDGLDAVR.S	1510.67	-0.287309	2	CID	1.43802e-08	2.9766	0.522523	1089.09	1	16/26
	603, OB342_110528200457	K.IQQLTGESWHNIR.Q	1581.81	0.249333	2	CID	1.46659e-08	3.70087	0.531313	814.926	1	15/24
	572, OB341_110528183951	R.ANNFNGNNLIECDQK.I	1750.78	-0.413406	2	CID	1.58802e-08	3.33051	0.610269	970.595	1	18/28
	603, OB338	K.IQQLTGESWHNIR.Q	1581.81	-0.207718	2	CID	1.89689e-08	4.57783	0.59867	1563.71	1	18/24
	589, OB339	K.IQQLTGESWHNIR.Q	1581.81	-0.372309	2	CID	2.26603e-08	4.22495	0.578387	1315.39	1	17/24
	577, OB338	K.SYVSFDSGSDDPNNSR.H	1746.72	-0.241488	2	CID	2.33353e-08	3.40981	0.647661	1609.51	1	21/30
	582, OB339	K.IQQLTGESWHNIR.Q	1581.81	-0.34345	2	CID	2.42991e-08	3.66468	0.618173	1214.37	1	16/24
	604, OB340	R.DSIASSSLHPLQEESPVEPNRK.S	2420.21	0.98666	3	CID	2.47297e-08	4.22951	0.628148	782.219	1	27/84
	668, OB341_110528183951	K.SEFSEADDGLDAVR.S	1510.67	-0.406434	2	CID	2.57953e-08	2.56237	0.502494	1014.17	1	16/26
	647, OB342_110528200457	R.LSVVSNTSYASSLR.D	1483.78	-0.352442	2	CID	3.41749e-08	3.6412	0.607468	658.835	1	15/26
	999, OB340	R.NYCFYVLDGLDPDPSNCR.R	2204.94	-0.380155	2	CID	3.6841e-08	2.06884	0.389672	1335.42	1	19/34
	584, OB341_110528183951	K.IQQLTGESWHNIR.Q	1581.81	-0.192134	2	CID	5.20542e-08	4.125	0.495916	1150.42	1	17/24
	543, OB340	R.QLAALEAAHQQASPDSAR.S	1863.93	-0.0455468	2	CID	5.86545e-08	3.68691	0.603894	467.691	1	15/34
	967, OB338	R.DAPPIPSIADTWLNNGTPPTR.A	2233.12	0.949244	2	CID	6.64345e-08	2.49635	0.500405	117.001	1	14/40
	889, OB341	R.ANNFNGNNLIECDQK.I	1750.78	-0.367263	2	CID	6.67478e-08	3.01626	0.422191	557.863	1	14/28
	572, OB338	K.SYVSFDSGSDDPNNSR.H	1746.72	1.24852	2	CID	9.19417e-08	2.89549	0.527255	865.429	1	16/30
	1037, OB341	R.HSLLDENASVAATDGGSFNER.L	2190.01	0.715996	3	CID	9.67911e-08	5.15789	0.597406	1758.27	1	31/80
	513, OB342_110528200457	R.QLAALEAAHQQASPDSAR.S	1863.93	0.566091	2	CID	1.15631e-07	3.88558	0.618433	770.222	1	18/34
	973, OB340	K.TPDEIILCVLK.K	1300.72	-0.380466	2	CID	1.22727e-07	3.49987	0.458495	1213.83	1	17/20
	963, OB341_110528183951	K.TPDEIILCVLK.K	1300.72	-0.35235	2	CID	1.62203e-07	3.98137	0.476918	1251.03	1	17/20
	609, OB338	K.IQQLTGESWHNIR.Q	1581.81	-0.495946	2	CID	1.67674e-07	3.17458	0.562437	699.338	1	13/24
	952, OB338	K.TPDEIILCVLK.K	1300.72	-0.415934	2	CID	1.78607e-07	3.36742	0.503456	1472.97	1	18/20
	753, OB341	R.QLAALEAAHQQASPDSAR.S	1863.93	0.634761	3	CID	1.89113e-07	2.51066	0.417693	498.018	1	24/68
	579, OB341_110528183951	K.IQQLTGESWHNIR.Q	1581.81	-0.27091	2	CID	2.08292e-07	4.44102	0.539331	1113.74	1	16/24
	977, OB340	K.TPDEIILCVLK.K	1300.72	-0.292154	2	CID	2.13086e-07	3.46884	0.489631	1198.5	1	17/20
	950, OB338	K.TPDEIILCVLK.K	1300.72	-0.348266	2	CID	2.42753e-07	3.52263	0.4698	1361.88	1	16/20
	970, OB339	K.TPDEIILCVLK.K	1300.72	-0.375766	2	CID	2.47689e-07	3.40863	0.508932	1463.21	1	18/20
	585, OB341_110528183951	R.AAQLALDESQQAHMNALSSSNAR.N	2413.15	1.16233	3	CID	2.51347e-07	3.607	0.573338	989.315	1	31/88
	947, OB342	R.QLAALEAAHQQASPDSAR.S	1863.93	-0.671947	2	CID	2.661e-07	2.9917	0.498968	394.524	1	17/34
	628, OB340	K.IQQLTGESWHNIR.Q	1581.81	-0.202672	2	CID	2.69738e-07	4.19937	0.533126	1150.24	1	16/24
	527, OB338	R.AAQLALDESQQAHM*NALSSSNAR.N	2429.15	1.10336	3	CID	3.82107e-07	3.7707	0.518676	702.285	1	25/88
	652, OB338	R.LSVVSNTSYASSLR.D	1483.78	-0.423284	2	CID	4.0322e-07	3.06275	0.404159	805.336	1	15/26
	668, OB339	K.SEFSEADDGLDAVR.S	1510.67	-0.418102	2	CID	4.04535e-07	3.41648	0.542733	1276.45	1	18/26
	908, OB341	K.IQQLTGESWHNIR.Q	1581.81	-0.315315	2	CID	4.18049e-07	3.63249	0.521057	857.091	1	14/24
	1070, OB341	K.SEFSEADDGLDAVR.S	1510.67	-0.387391	2	CID	4.97005e-07	3.04718	0.518042	1610.18	1	20/26
	967, OB341_110528183951	K.TPDEIILCVLK.K	1300.72	-0.29238	2	CID	5.80387e-07	3.87413	0.476991	1138	1	16/20
	1049, OB341	R.HSLLDENASVAATDGGSFNER.L	2190.01	0.254994	2	CID	7.19576e-07	3.10262	0.540937	972.638	1	19/40
	952, OB342_110528200457	K.TPDEIILCVLK.K	1300.72	-0.330525	2	CID	7.43209e-07	4.00212	0.503403	1479.19	1	18/20
	913, OB341	K.IQQLTGESWHNIR.Q	1581.81	0.332423	2	CID	7.72798e-07	4.15384	0.614297	1391.57	1	18/24
	633, OB342_110528200457	K.AYAGPLGLPSSQTPTASYHTTTQK.S	2477.23	0.443352	3	CID	1.01916e-06	3.58342	0.617663	364.004	1	24/92
	507, OB338	R.QLAALEAAHQQASPDSAR.S	1863.93	1.26281	3	CID	1.02915e-06	2.64097	0.551571	409.321	1	23/68
	662, OB340	K.AYAGPLGLPSSQTPTASYHTTTQK.S	2477.23	0.73156	3	CID	1.04648e-06	2.55491	0.587505	211.603	1	20/92
	934, OB342	R.QLAALEAAHQQASPDSAR.S	1863.93	0.753413	3	CID	1.08515e-06	3.35969	0.549539	219.784	1	17/68
	423, OB341_110528183951	K.KLQLPEHQYR.N	1311.72	-0.0689731	2	CID	1.14603e-06	3.60997	0.330516	767.206	1	15/18
	677, OB342_110528200457	K.SEFSEADDGLDAVR.S	1510.67	-0.361103	2	CID	1.15409e-06	2.29144	0.402508	1350.51	1	18/26
	968, OB338	R.NYCFYVLDGLDPDPSNCR.R	2204.94	-0.428413	2	CID	1.18621e-06	2.1605	0.435835	1912.74	1	20/34
	672, OB340	R.LSVVSNTSYASSLR.D	1483.78	-0.467147	2	CID	1.20925e-06	4.10195	0.511025	627.454	1	14/26
	443, OB338	K.KLQLPEHQYR.N	1311.72	-0.203304	2	CID	1.28925e-06	3.4232	0.411812	793.905	1	15/18
	427, OB341_110528183951	K.KLQLPEHQYR.N	1311.72	-0.113877	2	CID	1.30047e-06	3.69083	0.326439	696.685	1	15/18
	592, OB342_110528200457	R.ANNFNGNNLIECDQK.I	1750.78	-0.394124	2	CID	1.39769e-06	2.58444	0.538901	569.933	1	14/28
	494, OB341_110528183951	R.QLAALEAAHQQASPDSAR.S	1863.93	0.197505	3	CID	1.55346e-06	2.51788	0.390395	487.03	1	22/68
	533, OB340	R.QLAALEAAHQQASPDSAR.S	1863.93	0.74023	3	CID	1.57067e-06	2.80818	0.418984	294.018	1	22/68
	512, OB338	R.QLAALEAAHQQASPDSAR.S	1863.93	0.719722	3	CID	1.58423e-06	2.14322	0.46939	472.896	1	22/68
	874, OB341	R.DSIASSSLHPLQEESPVEPNRK.S	2420.21	0.233364	3	CID	1.84268e-06	3.07085	0.483112	598.298	1	24/84
	622, OB341	K.KLQLPEHQYR.N	1311.72	-0.569599	2	CID	2.22404e-06	3.57597	0.303846	725.799	1	15/18
	644, OB338	R.DSIASSSLHPLQEESPVEPNR.K	2292.11	0.495076	3	CID	2.3844e-06	3.73122	0.584261	829.819	1	28/80
	632, OB338	K.AYAGPLGLPSSQTPTASYHTTTQK.S	2477.23	0.309318	3	CID	2.40426e-06	2.65982	0.410505	202.634	1	21/92
	608, OB341_110528183951	K.AYAGPLGLPSSQTPTASYHTTTQK.S	2477.23	0.00609579	3	CID	2.54154e-06	1.97595	0.358907	206.191	1	20/92
	985, OB342	R.ANNFNGNNLIECDQK.I	1750.78	0.0981698	2	CID	2.5458e-06	3.24845	0.51963	1135.4	1	18/28
	670, OB339	R.PLSVLSTRPGLPSTSYR.D	1831.01	0.751661	3	CID	2.79121e-06	2.9111	0.505477	460.159	1	24/64
	972, OB342_110528200457	R.DAPPIPSIADTWLNNGTPPTR.A	2233.12	0.937837	2	CID	3.10689e-06	3.05367	0.593072	276.257	1	19/40
	759, OB341	R.QLAALEAAHQQASPDSAR.S	1863.93	0.561252	2	CID	3.11554e-06	4.36665	0.575764	840.26	1	19/34
	468, OB340	K.KLQLPEHQYR.N	1311.72	-0.217089	2	CID	3.49522e-06	3.32656	0.370583	915.203	1	16/18
	420, OB341_110528183951	K.KLQLPEHQYR.N	1311.72	0.99027	3	CID	4.18951e-06	3.53656	0.428543	916.446	1	21/36
	999, OB341	K.AYAGPLGLPSSQTPTASYHTTTQK.S	2477.23	0.483863	2	CID	4.19608e-06	2.31946	0.270734	87.6684	1	10/46
	610, OB342_110528200457	K.IQQLTGESWHNIR.Q	1581.81	-0.352656	2	CID	4.48507e-06	3.42693	0.510859	846.203	1	14/24
	597, OB343_110528212932	R.LSVVSNTSYASSLR.D	1483.78	-0.400945	2	CID	4.99472e-06	4.24511	0.53543	1088.27	1	17/26
	547, OB340	R.AAQLALDESQQAHM*NALSSSNAR.N	2429.15	0.670501	3	CID	5.0179e-06	3.58111	0.556672	606.225	1	25/88
	632, OB341_110528183951	R.LSVVSNTSYASSLR.D	1483.78	-0.210109	2	CID	5.48227e-06	3.74758	0.47624	513.426	1	12/26
	962, OB338	R.DAPPIPSIADTWLNNGTPPTR.A	2233.12	0.75992	2	CID	6.4792e-06	1.81856	0.412308	216.463	1	17/40
	662, OB339	K.SEFSEADDGLDAVR.S	1510.67	-0.465394	2	CID	7.90728e-06	2.81762	0.533965	870.114	1	16/26
	647, OB338	R.LSVVSNTSYASSLR.D	1483.78	-0.310084	2	CID	8.05735e-06	3.09753	0.581275	900.47	1	16/26
	1038, OB341	R.LSVVSNTSYASSLR.D	1483.78	1.24985	2	CID	8.4704e-06	3.8211	0.56371	638.206	1	14/26
	645, OB338	R.DSIASSSLHPLQEESPVEPNR.K	2292.11	-0.274889	2	CID	1.08048e-05	3.12154	0.431346	334.98	1	16/40
	937, OB341	R.ANNFNGNNLIECDQK.I	1750.78	0.740321	2	CID	1.21149e-05	2.71569	0.565158	575.331	1	14/28
	613, OB339	K.AYAGPLGLPSSQTPTASYHTTTQK.S	2477.23	0.962639	3	CID	1.51014e-05	2.0662	0.42481	187.769	1	19/92
	567, OB341_110528183951	R.ANNFNGNNLIECDQK.I	1750.78	1.45062	2	CID	1.53749e-05	2.74234	0.480592	620.419	1	15/28
	537, OB340	R.QLAALEAAHQQASPDSAR.S	1863.93	0.614253	3	CID	1.74137e-05	2.63135	0.538981	362.598	1	21/68
	632, OB339	R.LSVVSNTSYASSLR.D	1483.78	-0.260572	2	CID	1.82343e-05	3.75354	0.569173	1149.89	1	17/26
	588, OB338	R.ANNFNGNNLIECDQK.I	1750.78	-0.0906974	2	CID	1.89641e-05	3.68075	0.507857	599.697	1	14/28
	623, OB340	K.IQQLTGESWHNIR.Q	1581.81	-0.186549	2	CID	1.92623e-05	4.18554	0.543159	1074.3	1	16/24
	637, OB339	R.LSVVSNTSYASSLR.D	1483.78	0.457127	2	CID	1.96729e-05	3.32161	0.535062	504.142	1	13/26
	647, OB342_110528200457	R.LSRAASRLSVVSNTSYASSLR.D	2225.2	0.404431	3	CID	2.03239e-05	2.8047	0.404798	181.477	1	14/80
	902, OB341	R.AAQLALDESQQAHMNALSSSNAR.N	2413.15	0.896097	3	CID	2.04306e-05	3.44577	0.560225	658.246	1	27/88
	482, OB338	K.LQLPEHQYR.N	1183.62	-0.239958	2	CID	2.13303e-05	2.16761	0.241183	451.24	1	12/16
	647, OB338	R.LSRAASRLSVVSNTSYASSLR.D	2225.2	-0.0797002	3	CID	2.2129e-05	2.54704	0.494953	167.102	1	12/80
	480, OB339	K.LQLPEHQYR.N	1183.62	-0.684325	2	CID	2.28391e-05	2.47797	0.370019	389.322	1	11/16
	467, OB341_110528183951	K.LQLPEHQYR.N	1183.62	-0.292296	2	CID	2.33796e-05	2.37337	0.314181	507.474	1	12/16
	658, OB340	K.AYAGPLGLPSSQTPTASYHTTTQK.S	2477.23	1.19042	3	CID	2.37407e-05	2.25301	0.349902	219.791	1	22/92
	467, OB340	K.KLQLPEHQYR.N	1311.72	0.64475	3	CID	2.67505e-05	3.60478	0.404444	1053.81	1	21/36
	589, OB342_110528200457	R.ANNFNGNNLIECDQK.I	1750.78	-0.409637	2	CID	3.03142e-05	2.96273	0.559283	1141.63	1	19/28
	632, OB341_110528183951	R.LSRAASRLSVVSNTSYASSLR.D	2225.2	-0.355823	3	CID	3.05933e-05	2.28342	0.403828	185.954	1	13/80
	672, OB340	R.LSRAASRLSVVSNTSYASSLR.D	2225.2	0.221325	3	CID	3.28531e-05	2.87604	0.390838	191.287	1	14/80
	579, OB339	R.ANNFNGNNLIECDQK.I	1750.78	0.257447	2	CID	3.43625e-05	3.6016	0.566987	732.625	1	15/28
	597, OB343_110528212932	R.LSRAASRLSVVSNTSYASSLR.D	2225.2	0.18507	3	CID	3.59368e-05	2.32995	0.17135	175.734	1	13/80
	889, OB343_110528212932	K.TPDEIILCVLK.K	1300.72	-0.346588	2	CID	3.65408e-05	3.20766	0.441733	899.899	1	15/20
	487, OB343_110528212932	R.AAQLALDESQQAHM*NALSSSNAR.N	2429.15	0.235076	3	CID	4.41643e-05	3.04169	0.604311	620.721	1	24/88
	978, OB342_110528200457	R.DAPPIPSIADTWLNNGTPPTR.A	2233.12	-0.418409	2	CID	4.50474e-05	2.55759	0.632039	257.892	1	18/40
	629, OB339	R.DSIASSSLHPLQEESPVEPNR.K	2292.11	-0.129503	2	CID	5.08983e-05	3.10922	0.474597	417.482	1	16/40
	1042, OB341	R.LSVVSNTSYASSLR.D	1483.78	0.26444	2	CID	5.17508e-05	2.97073	0.522645	486.669	1	12/26
	643, OB339	R.HSLLDENASVAATDGGSFNER.L	2190.01	0.441337	3	CID	5.40061e-05	5.28983	0.548864	2040.6	1	31/80
	512, OB340	K.LQLPEHQYR.N	1183.62	-0.207302	2	CID	6.44215e-05	2.33351	0.278281	482.653	1	12/16
	529, OB342_110528200457	R.AAQLALDESQQAHM*NALSSSNAR.N	2429.15	0.89096	3	CID	6.44764e-05	3.03582	0.402252	559.406	1	23/88
	633, OB338	K.AYAGPLGLPSSQTPTASYHTTTQK.S	2477.23	0.376776	2	CID	6.67741e-05	3.11547	0.324435	97.2513	1	10/46
	463, OB342_110528200457	K.KLQLPEHQYR.N	1311.72	0.416051	3	CID	9.47671e-05	3.86547	0.358627	1287.59	1	22/36
	422, OB341_110528183951	K.KLQLPEHQYR.N	1311.72	0.632482	3	CID	9.52514e-05	4.26202	0.451626	1127.08	1	21/36
	957, OB342_110528200457	K.TPDEIILCVLK.K	1300.72	-0.3486	2	CID	9.55734e-05	3.35667	0.491119	1038.41	1	15/20
	632, OB339	R.LSRAASRLSVVSNTSYASSLR.D	2225.2	0.644665	3	CID	9.67047e-05	2.76473	0.445839	264.743	1	15/80
	974, OB338	R.QNPSLDGMTMGSLLSNAPVIR.V	2201.11	-1.03326	2	CID	0.000105465	2.2587	0.506526	434.756	1	14/40
	707, OB341	K.LQLPEHQYR.N	1183.62	0.174237	2	CID	0.000107241	1.51217	0.37536	347.038	1	10/16
	612, OB341_110528183951	K.AYAGPLGLPSSQTPTASYHTTTQK.S	2477.23	0.729729	3	CID	0.000122329	2.3028	0.439527	228.952	1	20/92
	702, OB341	K.LQLPEHQYR.N	1183.62	-0.0644667	2	CID	0.000131361	2.31848	0.16741	398.909	1	11/16
	518, OB342_110528200457	R.QLAALEAAHQQASPDSAR.S	1863.93	0.482783	3	CID	0.000137266	2.69084	0.399108	596.181	1	25/68
	620, OB341_110528183951	K.AYAGPLGLPSSQTPTASYHTTTQK.S	2477.23	-0.0155878	2	CID	0.000141662	2.31738	0.157588	295.265	1	15/46
	1044, OB341	R.HSLLDENASVAATDGGSFNER.L	2190.01	1.23089	3	CID	0.000142624	5.42186	0.589165	1819.38	1	30/80
	428, OB339	K.KLQLPEHQYR.N	1311.72	0.379613	3	CID	0.000146196	3.60099	0.385869	867.989	1	21/36
	1003, OB339	R.DAPPIPSIADTWLNNGTPPTR.A	2233.12	1.03841	3	CID	0.000148431	3.42026	0.535659	478.433	1	21/80
	458, OB342_110528200457	K.KLQLPEHQYR.N	1311.72	0.544591	3	CID	0.000152377	3.17261	0.365988	1036.95	1	21/36
	998, OB341	K.AYAGPLGLPSSQTPTASYHTTTQK.S	2477.23	0.398308	3	CID	0.000153405	2.5896	0.484312	204.835	1	21/92
	592, OB338	R.ANNFNGNNLIECDQK.I	1750.78	0.345277	2	CID	0.000159672	3.27401	0.538685	568.082	1	13/28
	588, OB339	K.IQQLTGESWHNIR.Q	1581.81	0.569205	3	CID	0.000163604	2.21328	0.447519	439.039	1	20/48
	684, OB340	R.HSLLDENASVAATDGGSFNER.L	2190.01	0.551201	3	CID	0.000166619	5.64366	0.645093	1864.57	1	30/80
	699, OB340	K.SEFSEADDGLDAVR.S	1510.67	0.854908	2	CID	0.000184829	2.3377	0.418768	606.241	1	13/26
	425, OB339	K.KLQLPEHQYR.N	1311.72	-0.677054	2	CID	0.000184829	2.5919	0.337182	538.484	1	13/18
	677, OB340	R.LSVVSNTSYASSLR.D	1483.78	-0.31987	2	CID	0.00019394	3.44043	0.565734	702.869	1	15/26
	517, OB340	K.LQLPEHQYR.N	1183.62	-0.286436	2	CID	0.000214295	2.67112	0.309387	585.09	1	13/16
	522, OB338	R.AAQLALDESQQAHM*NALSSSNAR.N	2429.15	0.655852	3	CID	0.000222497	3.32511	0.48528	690.807	1	25/88
	612, OB340	R.ANNFNGNNLIECDQK.I	1750.78	0.180909	2	CID	0.000235005	2.92174	0.590288	553.205	1	14/28
	994, OB341	K.AYAGPLGLPSSQTPTASYHTTTQK.S	2477.23	0.937791	2	CID	0.000240579	2.02978	0.18029	242.437	1	14/46
	715, OB338	K.QYNTFQEPLIK.N	1380.72	0.227126	2	CID	0.000263854	2.30648	0.441854	217.749	1	10/20
	993, OB341	K.AYAGPLGLPSSQTPTASYHTTTQK.S	2477.23	1.25085	3	CID	0.000264012	2.69301	0.551974	207.783	1	21/92
	802, OB341	K.SSTFSESQTGTVYTSPTK.S	1907.89	-0.244592	2	CID	0.000269026	2.3835	0.528737	495.834	1	15/34
	465, OB342_110528200457	R.HNTTPSDHEIRPPQVSER.V	2100.02	-0.347293	3	CID	0.000287989	1.82276	0.193751	151.674	3	11/68
	942, OB341	R.ANNFNGNNLIECDQK.I	1750.78	0.741883	2	CID	0.000314966	2.5789	0.463474	428.546	1	12/28
	462, OB341_110528183951	K.LQLPEHQYR.N	1183.62	-0.461826	2	CID	0.000338682	1.53389	0.145564	412.003	1	11/16
	604, OB342_110528200457	R.AAQLALDESQQAHMNALSSSNAR.N	2413.15	0.801248	3	CID	0.000343677	3.65056	0.613502	613.114	1	23/88
	794, OB341	R.AAQLALDESQQAHM*NALSSSNAR.N	2429.15	0.857268	3	CID	0.000412127	2.50879	0.53087	443.083	1	19/88
	638, OB339	R.HSLLDENASVAATDGGSFNER.L	2190.01	0.573906	3	CID	0.000501287	6.31963	0.650739	1834.26	1	30/80
	493, OB339	R.QLAALEAAHQQASPDSAR.S	1863.93	1.07934	3	CID	0.000592457	2.78401	0.452589	372.167	1	20/68
	758, OB341	R.QLAALEAAHQQASPDSAR.S	1863.93	1.21777	3	CID	0.000658218	1.40944	0.31859	360.067	1	19/68
	499, OB339	R.QLAALEAAHQQASPDSAR.S	1863.93	0.976802	3	CID	0.000716891	2.62091	0.518117	360.698	1	20/68
	652, OB338	R.LSRAASRLSVVSNTSYASSLR.D	2225.2	0.690808	3	CID	0.000730594	2.55376	0.264364	261.79	1	15/80
	633, OB340	K.ILQEMGIK.K	931.528	-0.0735251	1	CID	0.00082986	2.15598	0.308552	536.716	2	10/14
	618, OB339	K.AYAGPLGLPSSQTPTASYHTTTQK.S	2477.23	0.398308	3	CID	0.000879872	2.51263	0.372592	247.497	1	21/92
	474, OB340	K.KLQLPEHQYR.N	1311.72	0.60227	3	CID	0.000905258	3.6897	0.466658	1027.06	1	22/36
	1042, OB341	R.LSRAASRLSVVSNTSYASSLR.D	2225.2	0.553112	3	CID	0.000940606	2.13333	0.20362	214.343	1	14/80
	442, OB338	K.KLQLPEHQYR.N	1311.72	0.955114	3	CID	0.00094633	3.78485	0.369392	893.639	1	20/36
	715, OB341	K.LQLPEHQYR.N	1183.62	-0.0979066	1	CID	0.00116852	1.40317	0.202915	214.025	1	7/16
	653, OB342_110528200457	R.LSRAASRLSVVSNTSYASSLR.D	2225.2	0.134899	3	CID	0.00120646	2.73214	0.411801	196.996	1	13/80
	604, OB338	K.IQQLTGESWHNIR.Q	1581.81	0.793326	3	CID	0.00123708	3.24609	0.57984	362.451	1	18/48
	653, OB342_110528200457	R.LSVVSNTSYASSLR.D	1483.78	-0.430791	2	CID	0.00128809	3.45109	0.553399	755.144	1	15/26
	614, OB342_110528200457	K.ILQEMGIK.K	931.528	0.0216153	2	CID	0.00130021	2.84616	0.162311	626.494	1	13/14
	617, OB341	K.KLQLPEHQYR.N	1311.72	0.910802	3	CID	0.00134978	4.33239	0.442194	1696.13	1	25/36
	1862, OB341	K.TPDEIILCVLK.K	1300.72	-0.747874	2	CID	0.00144587	1.94475	0.00260844	235.775	1	8/20
	637, OB339	R.LSRAASRLSVVSNTSYASSLR.D	2225.2	0.645031	3	CID	0.00145355	2.85686	0.403469	202.834	1	15/80
	518, OB340	K.LQLPEHQYR.N	1183.62	0.772977	3	CID	0.00151762	2.08157	0.209945	266.613	2	15/32
	583, OB339	K.IQQLTGESWHNIR.Q	1581.81	1.00426	3	CID	0.00172677	3.19639	0.489619	498.848	1	20/48
	677, OB340	R.LSRAASRLSVVSNTSYASSLR.D	2225.2	0.59779	3	CID	0.00184111	2.46676	0.393954	179.952	1	14/80
	709, OB341	K.LQLPEHQYR.N	1183.62	0.0646911	1	CID	0.00206705	2.16336	0.17122	215.748	1	7/16
	997, OB339	R.DAPPIPSIADTWLNNGTPPTR.A	2233.12	0.678194	2	CID	0.00218496	2.60906	0.419409	163.339	1	16/40
	649, OB338	R.DSIASSSLHPLQEESPVEPNR.K	2292.11	0.143513	3	CID	0.0022795	4.61212	0.575495	524.308	1	22/80
	632, OB340	K.ILQEMGIK.K	931.528	-0.0395613	2	CID	0.00228273	2.65337	0.167392	592.749	1	13/14
	637, OB342_110528200457	K.AYAGPLGLPSSQTPTASYHTTTQK.S	2477.23	0.696037	3	CID	0.00232771	1.7148	0.394254	134.716	1	16/92
	972, OB338	R.DAPPIPSIADTWLNNGTPPTR.A	2233.12	0.553546	3	CID	0.00239578	2.60905	0.448932	514.369	1	23/80
	439, OB338	K.KLQLPEHQYR.N	1311.72	0.800573	3	CID	0.00256353	4.02692	0.374343	1082.44	1	22/36
	613, OB341	K.KLQLPEHQYR.N	1311.72	1.41343	3	CID	0.00261712	4.12052	0.429931	913.491	1	20/36
	552, OB341	R.HNTTPSDHEIRPPQVSER.V	2100.02	1.45776	3	CID	0.00267172	2.153	0.416828	167.571	1	14/68
	972, OB339	K.TPDEIILCVLK.K	1300.72	-0.225641	2	CID	0.00280368	3.19905	0.425152	1002.86	1	15/20
	565, OB342_110528200457	K.SSTFSESQTGTVYTSPTK.S	1907.89	0.45544	2	CID	0.00345419	1.72501	0.36378	40.4485	1	7/34
	398, OB339	R.HNTTPSDHEIRPPQVSER.V	2100.02	0.380002	3	CID	0.00371338	2.39701	0.414614	159.41	1	14/68
	988, OB342	R.ANNFNGNNLIECDQK.I	1750.78	0.783158	2	CID	0.00373494	2.16661	0.345587	428.062	1	12/28
	583, OB341_110528183951	K.ILQEMGIK.K	931.528	-0.453695	2	CID	0.00380816	2.60801	0.1671	613.484	1	13/14
	624, OB340	K.IQQLTGESWHNIR.Q	1581.81	1.22252	3	CID	0.00383439	2.95042	0.327473	251.335	1	17/48
	937, OB342	K.SSTFSESQTGTVYTSPTK.S	1907.89	0.384677	2	CID	0.00393878	1.87204	0.447552	332.907	1	14/34
	638, OB340	K.ILQEMGIK.K	931.528	-0.731672	2	CID	0.00407232	2.52996	0.140472	487.012	1	12/14
	445, OB339	R.HNTTPSDHEIRPPQVSER.V	2100.02	1.22888	3	CID	0.00459022	2.58565	0.369252	297.488	1	16/68
	1100, OB343	K.TPDEIILCVLK.K	1300.72	-0.601125	2	CID	0.00499661	3.20445	0.455741	488.358	1	11/20
	823, OB343_110528212932	K.SPFLATTLT.-	950.519	-0.561746	2	CID	0.00502311	1.69133	0.261122	275.071	1	11/16
	512, OB342_110528200457	R.QLAALEAAHQQASPDSAR.S	1863.93	1.18188	3	CID	0.0050462	3.47952	0.627262	411.521	1	21/68
	403, OB339	R.HNTTPSDHEIRPPQVSER.V	2100.02	1.08386	3	CID	0.00505901	1.77068	0.27555	329.571	1	18/68
	422, OB339	K.KLQLPEHQYR.N	1311.72	1.0203	3	CID	0.00527046	3.73758	0.360322	778.015	1	20/36
	703, OB341	K.LQLPEHQYR.N	1183.62	0.664579	3	CID	0.00608588	1.54147	0.184868	312.822	1	15/32
	1004, OB342	K.AYAGPLGLPSSQTPTASYHTTTQK.S	2477.23	0.896721	3	CID	0.00635864	1.77909	0.282095	107.304	1	15/92
	970, OB338	R.DAPPIPSIADTWLNNGTPPTR.A	2233.12	1.27864	3	CID	0.00638513	2.44321	0.373889	291.736	1	17/80
	923, OB341	K.ILQEMGIK.K	931.528	0.0686124	2	CID	0.00728011	2.03728	0.118515	584.458	1	13/14
	613, OB340	R.DSIASSSLHPLQEESPVEPNRK.S	2420.21	-0.527892	2	CID	0.00730312	2.05314	0.513127	178.547	1	12/42
	967, OB343	R.LSVVSNTSYASSLR.D	1483.78	-0.23147	2	CID	0.00813131	3.24926	0.555559	699.111	1	14/26
	1014, OB342	K.AYAGPLGLPSSQTPTASYHTTTQK.S	2477.23	0.608513	3	CID	0.00818914	2.44181	0.136518	122.516	2	15/92
	610, OB338	K.IQQLTGESWHNIR.Q	1581.81	0.409537	3	CID	0.0111561	2.73933	0.409767	423.179	1	20/48
	1055, OB338	K.TPDEIILCVLK.K	1300.72	0.104176	2	CID	0.0114264	2.11003	0.392479	160.519	1	8/20
	1518, OB341	K.TPDEIILCVLK.K	1300.72	0.49236	2	CID	0.012368	2.09656	0.406997	329.785	1	10/20
	1048, OB340	R.QNPSLDGMTMGSLLSNAPVIR.V	2201.11	-1.41972	2	CID	0.0144518	2.16838	0.578669	462.594	1	15/40
	1554, OB338	K.TPDEIILCVLK.K	1300.72	-0.116058	2	CID	0.0188048	1.87988	0.219883	163.332	1	8/20
	585, OB340	K.SSTFSESQTGTVYTSPTK.S	1907.89	0.432491	2	CID	0.0201702	1.20854	0.297433	59.5951	1	10/34
	607, OB338	K.ILQEMGIK.K	931.528	0.0132669	1	CID	0.0240345	1.60136	0.174401	618.473	1	10/14
	1424, OB338	K.TPDEIILCVLK.K	1300.72	1.31072	2	CID	0.0267763	1.39344	0.0713089	143.111	1	8/20
	1170, OB340	K.TPDEIILCVLK.K	1300.72	-0.400462	2	CID	0.0301945	2.03331	0.204025	219.493	1	9/20
	907, OB341	K.IQQLTGESWHNIR.Q	1581.81	0.905752	3	CID	0.0310195	2.75768	0.297103	432.576	1	18/48
	665, OB340	K.AYAGPLGLPSSQTPTASYHTTTQK.S	2477.23	0.961066	2	CID	0.0335961	2.15632	0.280702	166.15	1	13/46
	565, OB341_110528183951	R.DSIASSSLHPLQEESPVEPNRK.S	2420.21	-0.655063	3	CID	0.0341716	2.74255	0.467493	348.475	2	18/84
	985, OB338	R.QNPSLDGMTMGSLLSNAPVIR.V	2201.11	1.2986	2	CID	0.0355569	1.92979	0.342304	308.607	1	13/40
	629, OB340	K.IQQLTGESWHNIR.Q	1581.81	0.642447	3	CID	0.03643	2.54167	0.462847	426.892	1	20/48
	582, OB341_110528183951	K.ILQEMGIK.K	931.528	-0.147866	1	CID	0.0417491	1.94	0.213323	549.919	1	10/14
	967, OB343	R.LSRAASRLSVVSNTSYASSLR.D	2225.2	0.176647	3	CID	0.0441097	1.69648	0.0260038	179.907	1	13/80
	1663, OB340	K.TPDEIILCVLK.K	1300.72	0.800466	2	CID	0.0458819	1.28867	0.141259	233.304	1	8/20
	653, OB340	R.IFVAIK.Q	690.455	-0.0508209	1	CID	0.0534336	1.62267	0.0464945	575.168	1	8/10
	608, OB339	R.IFVAIK.Q	690.455	-0.178995	1	CID	0.0569028	1.73056	0.0614552	472.197	1	8/10
	942, OB340	R.PSLQGSVYWMAPEVVR.Q	1818.92	1.13329	2	CID	0.0708335	1.87348	0.178289	134.477	1	9/30
	998, OB340	R.DAPPIPSIADTWLNNGTPPTR.A	2233.12	1.30794	3	CID	0.08588	1.84997	0.346692	259.066	1	17/80
	472, OB341_110528183951	K.LQLPEHQYR.N	1183.62	0.561307	3	CID	0.0872558	2.34185	0.317164	189.712	2	14/32
	418, OB338	R.HNTTPSDHEIRPPQVSER.V	2100.02	1.41052	3	CID	0.095081	1.80882	0.459031	148.377	1	14/68
	963, OB341	R.IFVAIK.Q	690.455	-0.0881744	1	CID	0.0957431	1.71902	0.0709365	483.554	1	8/10
2	AN7252 | Aspergillus nidulans (AN7252.3) conserved hypothetical protein (translation) (495 aa)						2.06424e-11	190.238	42.7	54316	AN7252.3	149 (147 1 0 0 1)
	517, OB342_110528200457	R.KQQQAPESTTAYPPSGGSAPNSAGFEPR.Q	2860.35	0.578068	3	CID	2.06424e-11	3.2532	0.550411	834.498	1	34/108
	497, OB341_110528183951	R.KQQQAPESTTAYPPSGGSAPNSAGFEPR.Q	2860.35	0.626774	3	CID	3.4851e-11	4.03344	0.577425	933.276	1	37/108
	992, OB341	K.SQPLPPPTAVSSSDGYYDDR.L	2151.98	0.319428	2	CID	3.61322e-11	1.8945	0.35159	285.143	1	19/38
	607, OB341_110528183951	K.SQPLPPPTAVSSSDGYYDDR.L	2151.98	-0.422689	2	CID	4.62475e-11	1.76241	0.431957	147.782	1	14/38
	612, OB339	K.SQPLPPPTAVSSSDGYYDDR.L	2151.98	-0.0684006	2	CID	6.29752e-11	2.22244	0.640449	242.3	1	17/38
	647, OB340	K.SQPLPPPTAVSSSDGYYDDR.L	2151.98	0.305969	2	CID	6.29752e-11	2.26963	0.241164	178.847	1	16/38
	652, OB340	K.SQPLPPPTAVSSSDGYYDDR.L	2151.98	-0.322978	2	CID	9.46421e-11	1.73374	0.252928	211.41	1	17/38
	479, OB343_110528212932	R.KQQQAPESTTAYPPSGGSAPNSAGFEPR.Q	2860.35	0.589787	3	CID	2.38822e-10	4.58926	0.614496	1223.49	1	39/108
	947, OB341	K.SQPLPPPTAVSSSDGYYDDR.L	2151.98	-0.180258	2	CID	5.6866e-10	3.206	0.575711	244.952	1	17/38
	613, OB341_110528183951	K.SQPLPPPTAVSSSDGYYDDR.L	2151.98	-0.233236	2	CID	8.62204e-10	2.39256	0.632614	228.126	1	18/38
	997, OB341	K.SQPLPPPTAVSSSDGYYDDR.L	2151.98	-0.434591	2	CID	1.05487e-09	1.41436	0.444234	289.021	1	19/38
	617, OB339	K.SQPLPPPTAVSSSDGYYDDR.L	2151.98	-0.717713	2	CID	1.67853e-09	2.32469	0.572394	244.531	1	18/38
	1103, OB341	R.AGGETPSVEIFK.S	1234.63	-0.403338	2	CID	4.20948e-09	3.04984	0.489041	527.163	1	15/22
	584, OB339	K.DKSQPLPPPTAVSSSDGYYDDR.L	2395.1	-0.342671	2	CID	4.97354e-09	1.67991	0.333846	466.631	1	17/42
	578, OB339	K.DKSQPLPPPTAVSSSDGYYDDR.L	2395.1	-0.09887	3	CID	1.90624e-08	4.76628	0.547558	1226.3	1	29/84
	783, OB340	R.LSGSTLTGQQSGITILDR.S	1846.99	-0.341142	2	CID	4.07082e-08	3.66295	0.550488	1108.12	1	18/34
	414, OB342_110528200457	K.NNSPTHIPPSIHENR.A	1712.85	0.129863	3	CID	5.57646e-08	2.45075	0.355745	631.705	1	18/56
	758, OB343_110528212932	K.QYALYIVYGDQER.C	1617.79	-0.342112	2	CID	8.40729e-08	3.60116	0.582368	1024.99	1	16/24
	753, OB341_110528183951	R.LSGSTLTGQQSGITILDR.S	1846.99	-0.267575	2	CID	8.8865e-08	4.73051	0.590024	1099.7	1	19/34
	540, OB340	R.KQQQAPESTTAYPPSGGSAPNSAGFEPR.Q	2860.35	0.398258	3	CID	1.19001e-07	2.61697	0.451297	747.685	1	33/108
	760, OB340	R.AYNDGTNLDPSAAAVAASSHLSTMNGK.S	2663.24	-0.364174	3	CID	1.58911e-07	3.33542	0.53276	299.859	1	18/104
	697, OB338	R.AGGETPSVEIFK.S	1234.63	0.122804	2	CID	1.73991e-07	2.34343	0.364921	429.898	1	14/22
	779, OB340	R.LSGSTLTGQQSGITILDR.S	1846.99	-0.415392	2	CID	1.78554e-07	4.22493	0.556023	1555.21	1	22/34
	627, OB338	K.SQPLPPPTAVSSSDGYYDDR.L	2151.98	0.796084	2	CID	2.1491e-07	2.10834	0.549435	361.693	1	20/38
	377, OB341_110528183951	K.NNSPTHIPPSIHENR.A	1712.85	0.634136	3	CID	2.72711e-07	4.50938	0.549991	734.489	1	23/56
	618, OB340	K.DKSQPLPPPTAVSSSDGYYDDR.L	2395.1	0.884773	3	CID	2.80177e-07	2.80773	0.469404	457.197	1	21/84
	952, OB341	K.SQPLPPPTAVSSSDGYYDDR.L	2151.98	-0.252686	2	CID	2.99495e-07	2.53625	0.592754	303.187	1	18/38
	692, OB342_110528200457	R.AGGETPSVEIFK.S	1234.63	-0.415388	2	CID	3.32733e-07	3.03398	0.513556	706.596	1	17/22
	637, OB343_110528212932	R.AGGETPSVEIFK.S	1234.63	-0.307228	2	CID	3.46269e-07	2.73098	0.529842	638.911	1	16/22
	1037, OB342	R.AGGETPSVEIFK.S	1234.63	-0.341042	2	CID	4.30029e-07	2.69064	0.506177	679.835	1	16/22
	748, OB339	R.LSGSTLTGQQSGITILDR.S	1846.99	-0.324052	2	CID	4.41145e-07	4.62531	0.58949	1481.67	1	21/34
	839, OB342_110528200457	R.AGGETPSVEIFK.S	1234.63	0.11548	2	CID	4.53821e-07	3.07405	0.485385	562.571	1	15/22
	760, OB342_110528200457	R.LSGSTLTGQQSGITILDR.S	1846.99	-0.501705	2	CID	5.66328e-07	3.34203	0.493891	798.967	1	16/34
	758, OB338	R.LSGSTLTGQQSGITILDR.S	1846.99	-0.212968	2	CID	6.18054e-07	3.84822	0.551728	577.385	1	15/34
	877, OB343	R.KQQQAPESTTAYPPSGGSAPNSAGFEPR.Q	2860.35	1.34894	3	CID	6.3885e-07	2.97456	0.44388	585.692	1	28/108
	722, OB340	R.AGGETPSVEIFK.S	1234.63	0.690941	2	CID	6.50188e-07	2.80273	0.501615	603.138	1	15/22
	755, OB339	R.LSGSTLTGQQSGITILDR.S	1846.99	-0.32271	2	CID	6.8873e-07	4.34804	0.517985	1318.41	1	21/34
	669, OB339	R.AYNDGTNLDPSAAAVAASSHLSTM*NGK.S	2679.24	0.437817	3	CID	1.32382e-06	2.58263	0.417592	398.09	1	22/104
	693, OB338	R.AGGETPSVEIFK.S	1234.63	0.301271	2	CID	1.41197e-06	2.33696	0.505409	740.868	1	17/22
	518, OB338	R.KQQQAPESTTAYPPSGGSAPNSAGFEPR.Q	2860.35	0.600773	3	CID	1.598e-06	3.2835	0.479166	607.804	1	31/108
	1024, OB341	K.SQLSPNLPSPTSPSNHYGAPQTLASR.A	2707.34	0.271851	2	CID	1.82763e-06	2.42081	0.572062	330.854	1	14/50
	417, OB340	K.NNSPTHIPPSIHENR.A	1712.85	1.3347	3	CID	1.99772e-06	4.56216	0.584034	870.272	1	23/56
	678, OB339	R.AGGETPSVEIFK.S	1234.63	-0.170774	2	CID	2.95185e-06	3.31643	0.539726	840.878	1	17/22
	914, OB341	K.YNINGDWK.Q	1009.47	-0.00599771	1	CID	3.44872e-06	1.88071	0.367959	729.149	1	11/14
	574, OB339	K.DKSQPLPPPTAVSSSDGYYDDR.L	2395.1	0.926521	3	CID	3.49502e-06	3.51437	0.436275	645.581	1	23/84
	710, OB343_110528212932	R.LSGSTLTGQQSGITILDR.S	1846.99	0.992902	2	CID	4.86226e-06	3.29648	0.574471	453.765	1	13/34
	537, OB341	K.NNSPTHIPPSIHENR.A	1712.85	0.379986	3	CID	5.35708e-06	4.14002	0.556382	802.809	1	23/56
	642, OB343_110528212932	R.AGGETPSVEIFK.S	1234.63	-0.33152	2	CID	5.91108e-06	2.13309	0.513248	513.903	1	15/22
	682, OB341_110528183951	R.AGGETPSVEIFK.S	1234.63	-0.427549	2	CID	6.26565e-06	2.7555	0.473279	659.702	1	16/22
	664, OB339	K.SQPLPPPTAVSSSDGYYDDR.L	2151.98	-0.469122	2	CID	6.27824e-06	2.12104	0.35093	224.312	1	16/38
	464, OB340	K.NNSPTHIPPSIHENR.A	1712.85	1.16917	3	CID	6.45399e-06	3.28539	0.500353	860.656	1	21/56
	468, OB338	K.NNSPTHIPPSIHENR.A	1712.85	0.600811	3	CID	8.72882e-06	2.39508	0.23458	531.986	1	20/56
	1100, OB341	R.AGGETPSVEIFK.S	1234.63	-0.369306	2	CID	9.55167e-06	2.48659	0.4536	704.244	1	17/22
	1104, OB341	R.AGGETPSVEIFK.S	1234.63	0.951126	1	CID	1.0334e-05	2.63021	0.346224	399.355	1	10/22
	514, OB338	R.KQQQAPESTTAYPPSGGSAPNSAGFEPR.Q	2860.35	1.44928	3	CID	1.04368e-05	4.33603	0.571687	675.774	1	32/108
	502, OB339	R.KQQQAPESTTAYPPSGGSAPNSAGFEPR.Q	2860.35	0.476627	3	CID	1.046e-05	3.69336	0.462693	755.102	1	33/108
	1143, OB341	R.LREELLPVFK.M	1243.74	-0.293296	2	CID	1.45178e-05	3.31981	0.402894	795.897	1	14/18
	797, OB340	R.LREELLPVFK.M	1243.74	-0.239982	2	CID	1.45886e-05	2.70344	0.478469	719.987	1	13/18
	762, OB342_110528200457	R.LSGSTLTGQQSGITILDR.S	1846.99	0.0943436	2	CID	1.50414e-05	3.77723	0.58066	1322.83	1	19/34
	750, OB341_110528183951	R.LREELLPVFK.M	1243.74	-0.245658	2	CID	2.11967e-05	2.98694	0.326125	568.384	1	12/18
	482, OB343_110528212932	R.KQQQAPESTTAYPPSGGSAPNSAGFEPR.Q	2860.35	0.962223	3	CID	2.14429e-05	4.48087	0.527111	1046.92	1	37/108
	739, OB338	R.AYNDGTNLDPSAAAVAASSHLSTMNGK.S	2663.24	0.313682	3	CID	2.18481e-05	2.28008	0.241784	401.628	1	21/104
	549, OB339	R.KQQQAPESTTAYPPSGGSAPNSAGFEPR.Q	2860.35	0.562687	3	CID	2.49368e-05	2.77219	0.363098	510.536	1	29/108
	522, OB342_110528200457	R.KQQQAPESTTAYPPSGGSAPNSAGFEPR.Q	2860.35	1.18378	3	CID	2.93484e-05	3.91849	0.487741	436.89	1	26/108
	1022, OB341	K.IMTVETELR.R	1091.58	-0.292538	2	CID	3.78823e-05	1.91282	0.303044	837.974	1	15/16
	619, OB339	K.SQPLPPPTAVSSSDGYYDDR.L	2151.98	0.359218	3	CID	3.86504e-05	4.31694	0.548913	675.471	1	29/76
	762, OB340	R.AYNDGTNLDPSAAAVAASSHLSTMNGK.S	2663.24	1.31197	3	CID	3.97894e-05	1.9227	0.2292	284.441	1	17/104
	372, OB339	K.NNSPTHIPPSIHENR.A	1712.85	1.20652	3	CID	4.68376e-05	4.52928	0.572503	687.611	1	21/56
	1008, OB343	R.AGGETPSVEIFK.S	1234.63	0.0693372	2	CID	5.58201e-05	2.39128	0.405477	452.162	1	14/22
	1008, OB341	K.SQLSPNLPSPTSPSNHYGAPQTLASR.A	2707.34	0.281419	3	CID	5.93264e-05	1.74178	0.196427	180.229	1	19/100
	590, OB339	K.YNINGDWK.Q	1009.47	-0.305632	2	CID	8.25146e-05	2.54634	0.267921	865.813	1	12/14
	423, OB340	K.NNSPTHIPPSIHENR.A	1712.85	0.968486	3	CID	8.36001e-05	4.22978	0.523434	1281.41	1	26/56
	642, OB338	K.IMTVETELR.R	1091.58	-0.000901425	2	CID	9.01086e-05	2.5471	0.352556	516.44	1	12/16
	679, OB341_110528183951	R.AGGETPSVEIFK.S	1234.63	-0.138718	1	CID	9.19967e-05	2.23924	0.469296	295.691	1	9/22
	712, OB340	R.AYNDGTNLDPSAAAVAASSHLSTM*NGK.S	2679.24	1.12483	3	CID	9.26873e-05	1.38053	0.505371	161.015	1	14/104
	547, OB341	K.NNSPTHIPPSIHENR.A	1712.85	0.844707	3	CID	0.000123258	2.66716	0.507776	354.009	1	17/56
	747, OB339	R.LREELLPVFK.M	1243.74	-0.298169	2	CID	0.00013902	2.81241	0.406241	620.542	1	13/18
	752, OB341	R.KQQQAPESTTAYPPSGGSAPNSAGFEPR.Q	2860.35	0.874332	3	CID	0.000146016	3.45415	0.342479	494.333	1	26/108
	1008, OB342	K.YNINGDWK.Q	1009.47	0.976302	1	CID	0.000179528	1.45073	0.150092	850.721	1	10/14
	698, OB338	R.AGGETPSVEIFK.S	1234.63	0.0263209	1	CID	0.000181594	2.08342	0.224275	346.319	1	9/22
	608, OB342_110528200457	K.YNINGDWK.Q	1009.47	-0.137834	1	CID	0.000207106	1.95131	0.273119	434.34	1	9/14
	794, OB340	R.LREELLPVFK.M	1243.74	-0.270393	2	CID	0.000218825	2.88628	0.468031	795.811	1	14/18
	842, OB341	K.IMTVETELRR.V	1247.68	-0.222374	2	CID	0.000237557	2.28001	0.280427	649.675	1	12/18
	502, OB341	K.NNSPTHIPPSIHENR.A	1712.85	0.840679	3	CID	0.000269746	3.9144	0.524722	878.554	1	23/56
	932, OB342	R.KQQQAPESTTAYPPSGGSAPNSAGFEPR.Q	2860.35	0.84174	3	CID	0.000284722	3.68651	0.574304	589.689	1	29/108
	400, OB338	K.NNSPTHIPPSIHENR.A	1712.85	0.956768	3	CID	0.000289254	3.8895	0.531444	1069.31	1	24/56
	627, OB339	K.IMTVETELR.R	1091.58	1.16693	2	CID	0.000294893	2.60654	0.259288	627.459	1	13/16
	625, OB340	K.DKSQPLPPPTAVSSSDGYYDDR.L	2395.1	1.14478	3	CID	0.000340056	4.13517	0.410413	423.002	1	19/84
	580, OB341	K.NNSPTHIPPSIHENR.A	1712.85	-0.297139	3	CID	0.000356921	4.11951	0.498032	901.918	1	24/56
	624, OB341_110528183951	K.IMTVETELR.R	1091.58	0.45087	2	CID	0.000357908	2.10597	0.223517	384.63	1	10/16
	578, OB341_110528183951	K.YNINGDWK.Q	1009.47	-0.288237	2	CID	0.000365882	2.54105	0.29588	920.58	1	12/14
	667, OB340	K.IMTVETELR.R	1091.58	0.317569	2	CID	0.000366298	1.80759	0.305941	504.641	1	12/16
	1003, OB343	R.AGGETPSVEIFK.S	1234.63	-0.0326923	2	CID	0.000403137	3.1052	0.52287	648.999	1	16/22
	1070, OB342	K.QYALYIVYGDQER.C	1617.79	-0.314056	2	CID	0.000428387	1.96676	0.484402	587.491	1	12/24
	683, OB341_110528183951	R.AGGETPSVEIFK.S	1234.63	-0.146531	1	CID	0.000459478	2.29483	0.339824	349.442	1	10/22
	497, OB341	K.NNSPTHIPPSIHENR.A	1712.85	0.657573	3	CID	0.000463339	3.49246	0.46383	775.233	1	22/56
	745, OB341_110528183951	R.LREELLPVFK.M	1243.74	-0.200113	1	CID	0.000538277	2.20477	0.364912	127.366	1	9/18
	693, OB339	K.SQLSPNLPSPTSPSNHYGAPQTLASR.A	2707.34	0.00529592	3	CID	0.000664944	1.9946	0.182949	188.334	1	18/100
	617, OB341_110528183951	K.SQLSPNLPSPTSPSNHYGAPQTLASR.A	2707.34	1.21855	3	CID	0.000671292	2.42068	0.460181	337.84	1	24/100
	625, OB338	K.SQPLPPPTAVSSSDGYYDDR.L	2151.98	1.12067	2	CID	0.000759915	2.44074	0.601849	190.304	1	16/38
	768, OB338	R.LREELLPVFK.M	1243.74	-0.281104	2	CID	0.000768831	2.81266	0.392071	722.148	1	13/18
	1038, OB342	R.AGGETPSVEIFK.S	1234.63	-0.162644	1	CID	0.000996699	2.71498	0.446767	273.391	1	9/22
	542, OB340	R.KQQQAPESTTAYPPSGGSAPNSAGFEPR.Q	2860.35	0.517277	3	CID	0.00102405	4.00968	0.472264	706.315	1	32/108
	742, OB339	R.LREELLPVFK.M	1243.74	-0.313987	2	CID	0.00103235	2.91504	0.432298	851.303	1	14/18
	704, OB342_110528200457	R.AGGETPSVEIFK.S	1234.63	-0.096726	1	CID	0.0012161	3.03705	0.458448	501.773	1	11/22
	648, OB338	K.IMTVETELR.R	1091.58	-0.282261	2	CID	0.00126937	2.40042	0.314795	542.662	1	13/16
	757, OB341	R.KQQQAPESTTAYPPSGGSAPNSAGFEPR.Q	2860.35	0.951603	3	CID	0.00130093	3.78997	0.511251	905.081	1	35/108
	585, OB343_110528212932	K.SQPLPPPTAVSSSDGYYDDR.L	2151.98	-0.501211	2	CID	0.00177412	0.880555	0.189585	83.9452	1	10/38
	962, OB343	K.YNINGDWK.Q	1009.47	0.153856	2	CID	0.00206464	2.46438	0.137669	576.925	1	10/14
	552, OB343_110528212932	K.YNINGDWK.Q	1009.47	-0.334786	2	CID	0.00206831	2.16957	0.297271	450.933	1	9/14
	605, OB342_110528200457	K.YNINGDWK.Q	1009.47	0.84703	1	CID	0.0024719	1.56468	0.225776	538.81	1	10/14
	373, OB341_110528183951	K.NNSPTHIPPSIHENR.A	1712.85	0.60374	3	CID	0.00272408	4.22953	0.442757	1045.63	1	24/56
	749, OB343_110528212932	R.PLILFK.Q	730.486	-0.312526	2	CID	0.00280112	2.27576	0.105964	533.078	1	9/10
	917, OB341	K.YNINGDWK.Q	1009.47	-0.452665	2	CID	0.00349382	2.32752	0.316986	782.994	1	12/14
	587, OB341	K.NNSPTHIPPSIHENR.A	1712.85	0.0954396	3	CID	0.00397422	3.40664	0.554712	809.95	1	21/56
	1027, OB341	K.IMTVETELR.R	1091.58	0.106631	2	CID	0.00461823	2.34821	0.370218	647.476	1	14/16
	1042, OB342	R.AGGETPSVEIFK.S	1234.63	-0.0391088	1	CID	0.0056469	2.2497	0.459702	299.903	1	9/22
	644, OB340	K.YNINGDWK.Q	1009.47	0.617077	2	CID	0.00590369	1.28097	0.052216	613.77	1	11/14
	377, OB339	K.NNSPTHIPPSIHENR.A	1712.85	1.14573	3	CID	0.00590842	3.90822	0.549879	813.604	1	22/56
	623, OB339	K.IMTVETELR.R	1091.58	-0.210557	2	CID	0.00709018	1.8782	0.395771	507.338	1	12/16
	810, OB342_110528200457	R.PLILFK.Q	730.486	-0.348338	2	CID	0.00718379	2.14738	0.142101	533.093	1	9/10
	539, OB339	K.IMTVETELRR.V	1247.68	0.506009	2	CID	0.0076647	2.2254	0.183707	521.788	1	10/18
	655, OB340	K.SQPLPPPTAVSSSDGYYDDR.L	2151.98	0.320766	3	CID	0.00842856	3.06242	0.536941	311.634	1	20/76
	812, OB342_110528200457	R.PLILFK.Q	730.486	-0.339682	2	CID	0.00933605	2.25543	0.207195	504.713	1	9/10
	530, OB340	K.KYNINGDWK.Q	1137.57	0.193765	2	CID	0.0096733	2.06424	0.22933	252.261	1	8/16
	543, OB339	K.IMTVETELRR.V	1247.68	0.0802274	2	CID	0.0119556	2.33278	0.173347	593.816	1	11/18
	1007, OB342	K.YNINGDWK.Q	1009.47	0.626843	2	CID	0.0124714	1.7447	0.181816	476.431	1	9/14
	587, OB340	K.IMTVETELRR.V	1247.68	0.482083	2	CID	0.0153035	2.4122	0.169456	457.156	1	10/18
	599, OB343_110528212932	K.YNINGDWK.Q	1009.47	0.561841	2	CID	0.0156826	1.85971	0.0594565	759.117	1	10/14
	837, OB340	R.PLILFK.Q	730.486	-0.391284	2	CID	0.018339	2.20214	0.180053	533.878	1	9/10
	679, OB339	R.AGGETPSVEIFK.S	1234.63	-0.194382	1	CID	0.0185329	2.63433	0.430351	278.055	1	9/22
	829, OB339	R.EELLPVFK.M	974.556	-0.0550519	2	CID	0.0218158	1.27814	0.218436	154.835	1	8/14
	604, OB341_110528183951	K.YNINGDWK.Q	1009.47	0.664217	2	CID	0.0223685	1.7768	0.243515	541.534	1	10/14
	673, OB340	K.IMTVETELR.R	1091.58	-0.238226	2	CID	0.0238117	2.04343	0.362828	416.69	1	12/16
	730, OB340	R.AGGETPSVEIFK.S	1234.63	-0.168015	1	CID	0.0239721	2.01069	0.320251	277.068	1	9/22
	607, OB342_110528200457	K.YNINGDWK.Q	1009.47	-0.347014	2	CID	0.0250751	2.13738	0.319496	748.234	1	12/14
	744, OB343_110528212932	R.PLILFK.Q	730.486	-0.323131	2	CID	0.0294286	2.41211	0.156625	520.693	1	9/10
	557, OB343_110528212932	K.YNINGDWK.Q	1009.47	-0.317147	2	CID	0.0299405	2.20371	0.23905	661.093	1	11/14
	668, OB340	K.SQLSPNLPSPTSPSNHYGAPQTLASR.A	2707.34	0.408128	3	CID	0.0312692	2.82151	0.502735	260.644	1	22/100
	1005, OB342	K.YNINGDWK.Q	1009.47	0.0574867	2	CID	0.0366522	2.09119	0.214952	470.171	1	9/14
	682, OB339	R.AGGETPSVEIFK.S	1234.63	-0.120896	1	CID	0.0371929	2.49156	0.49544	559.784	1	12/22
	630, OB341_110528183951	K.IMTVETELR.R	1091.58	-0.611009	2	CID	0.0378586	2.39962	0.362773	523.643	1	12/16
	538, OB341	R.HDELKEM*GIASVGHR.L	1694.83	1.30286	3	CID	0.0425377	2.36589	0.343741	345.126	2	15/56
	965, OB343	K.YNINGDWK.Q	1009.47	-0.0493327	1	CID	0.0440145	1.6872	0.246014	454.449	1	8/14
	912, OB341	K.YNINGDWK.Q	1009.47	-0.364165	2	CID	0.0460189	2.2465	0.262907	936.773	1	12/14
	583, OB340	K.IMTVETELRR.V	1247.68	0.43887	2	CID	0.0545078	1.98947	0.0637663	358.758	1	9/18
	702, OB338	R.AGGETPSVEIFK.S	1234.63	-0.0903783	1	CID	0.0730714	2.06452	0.248698	280.612	1	9/22
	819, OB341	K.IM*TVETELR.R	1107.58	0.322319	2	CID	0.0796354	1.9818	0.291252	435.859	1	11/16
	698, OB342_110528200457	R.AGGETPSVEIFK.S	1234.63	-0.151902	1	CID	0.09651	1.98387	0.428267	523.524	1	11/22
3	AN3719 | Aspergillus nidulans (AN3719.3) mitogen-activated protein kinase (translation) (355 aa)						2.62013e-13	90.207	27.7	40971.9	AN3719.3	18 (18 0 0 0 0)
	732, OB338	R.SAASTDDNSGFMTEYVATR.W	2022.87	0.162845	2	CID	2.62013e-13	3.24574	0.631789	936.254	1	17/36
	594, OB338	R.SAASTDDNSGFM*TEYVATR.W	2038.87	0.406239	2	CID	2.70661e-11	3.64156	0.647865	1138.53	1	19/36
	727, OB338	R.SAASTDDNSGFMTEYVATR.W	2022.87	-0.392093	2	CID	6.65235e-11	2.71609	0.657286	1063.58	1	18/36
	813, OB340	R.TQDLSDDHCQYFIYQTLR.A	2303.04	0.158213	3	CID	1.84211e-06	4.14017	0.542691	373.629	1	20/68
	789, OB338	R.TQDLSDDHCQYFIYQTLR.A	2303.04	0.665415	3	CID	2.29767e-06	4.07547	0.475845	330.866	1	18/68
	765, OB340	R.SAASTDDNSGFMTEYVATR.W	2022.87	-0.235725	2	CID	2.44554e-06	3.25759	0.649469	1017.09	1	18/36
	895, OB338	K.ILIYEEIMR.-	1179.64	-0.325512	2	CID	2.58336e-06	2.63928	0.336148	1086.76	1	15/16
	783, OB338	R.DLKPSNLLLNANCDLK.V	1827.96	-0.664774	2	CID	7.10291e-06	2.19841	0.38594	281.146	1	12/30
	845, OB340	R.APEIMLTFK.E	1049.57	-0.395076	2	CID	3.0391e-05	2.17407	0.332659	533.881	1	12/16
	872, OB338	K.SNDLALDLLEK.L	1230.66	-0.443807	2	CID	4.7232e-05	2.94241	0.255394	1212.19	1	16/20
	903, OB340	K.SNDLALDLLEK.L	1230.66	-0.359851	2	CID	5.22929e-05	3.19056	0.365133	1219.72	1	16/20
	883, OB339	K.SNDLALDLLEK.L	1230.66	-0.321729	2	CID	5.36224e-05	3.47096	0.267199	1701.62	1	17/20
	855, OB340	R.APEIMLTFK.E	1049.57	-0.890808	2	CID	0.000133825	2.726	0.532014	445.781	1	11/16
	914, OB340	K.SNDLALDLLEK.L	1230.66	-0.272343	2	CID	0.000179271	2.54143	0.128423	955.206	1	14/20
	775, OB339	R.DLKPSNLLLNANCDLK.V	1827.96	1.06989	2	CID	0.000299714	2.74511	0.275045	295.013	1	11/30
	878, OB338	K.SNDLALDLLEK.L	1230.66	-0.321415	2	CID	0.000788557	3.29302	0.357819	992.374	1	15/20
	1010, OB341	R.ITVEEALR.H	930.525	-0.162733	2	CID	0.00210243	2.39356	0.336352	523.33	1	11/14
	664, OB338	K.LLAFNPTK.R	903.53	-0.0509601	1	CID	0.00291487	2.12971	0.231183	514.781	1	9/14
	AnSte50 (SteD)::cTAP asexual stage identifications
	Reference						P (pro)	Score	Coverage	MW	Accession	Peptide (Hits)
	Scan(s), File	Peptide	MH+	DeltaM	z	Type	P (pep)	XC	DeltaCn	Sp	RSp	Ions
1	AN3719 | Aspergillus nidulans (AN3719.3) mitogen-activated protein kinase (translation) (355 aa)						4.21885e-14	110.194	30.2	40971.9	AN3719.3	65 (64 0 0 0 1)
	712, OB347_1	R.SAASTDDNSGFMTEYVATR.W	2022.87	-0.216793	2	CID	4.21885e-14	3.41896	0.721902	1847.69	1	23/36
	713, OB346_110529014318	R.SAASTDDNSGFMTEYVATR.W	2022.87	-0.406765	2	CID	1.25455e-13	3.49588	0.6782	1276.88	1	19/36
	720, OB346_110529014318	R.SAASTDDNSGFMTEYVATR.W	2022.87	-0.432339	2	CID	2.68674e-13	3.27134	0.684119	1776.87	1	21/36
	1039, OB346	R.SAASTDDNSGFMTEYVATR.W	2022.87	-0.506207	2	CID	3.60267e-12	2.7882	0.703166	1532.99	1	19/36
	712, OB344_110528225409	R.SAASTDDNSGFMTEYVATR.W	2022.87	-0.459698	2	CID	7.59237e-11	2.42891	0.585423	1139.57	1	19/36
	1045, OB346	R.SAASTDDNSGFMTEYVATR.W	2022.87	-0.546495	2	CID	1.40531e-09	2.52773	0.621924	629.038	1	15/36
	574, OB347_1	R.SAASTDDNSGFM*TEYVATR.W	2038.87	-0.503227	2	CID	1.09556e-08	3.88609	0.722798	1773.19	1	20/36
	1027, OB344	R.SAASTDDNSGFMTEYVATR.W	2022.87	-0.31566	2	CID	1.29247e-08	2.88266	0.659849	814.43	1	17/36
	717, OB347_1	R.SAASTDDNSGFMTEYVATR.W	2022.87	0.298099	2	CID	2.20538e-08	3.31598	0.685963	1606.2	1	21/36
	774, OB347_1	R.TQDLSDDHCQYFIYQTLR.A	2303.04	-0.250403	2	CID	1.95954e-07	3.61287	0.522159	1162.81	1	17/34
	980, OB345	R.SAASTDDNSGFMTEYVATR.W	2022.87	0.0727471	2	CID	7.89523e-07	3.09435	0.699394	619.812	1	14/36
	1063, OB345	K.ILIYEEIMR.-	1179.64	-0.230133	2	CID	3.70334e-06	2.35829	0.190055	776.712	1	13/16
	874, OB347_1	K.ILIYEEIMR.-	1179.64	-0.341333	2	CID	6.60474e-06	2.47786	0.43862	1067.66	1	15/16
	773, OB347_1	R.TQDLSDDHCQYFIYQTLR.A	2303.04	1.42567	3	CID	6.9507e-06	2.53855	0.434189	339.166	1	20/68
	807, OB346_110529014318	R.APEIMLTFK.E	1049.57	-0.263982	2	CID	1.18371e-05	2.41574	0.378781	436.35	1	12/16
	1052, OB345	K.SNDLALDLLEK.L	1230.66	-0.434843	2	CID	1.82245e-05	3.04801	0.385497	1382.84	1	16/20
	882, OB346_110529014318	K.ILIYEEIMR.-	1179.64	-0.386139	2	CID	2.45515e-05	2.85722	0.286726	1235.49	1	15/16
	1083, OB344	K.ILIYEEIMR.-	1179.64	-0.348057	2	CID	2.49072e-05	2.68809	0.30556	1170.71	1	15/16
	864, OB346_110529014318	K.SNDLALDLLEK.L	1230.66	-0.384397	2	CID	2.50417e-05	3.28745	0.326495	1410.63	1	17/20
	598, OB347_1	K.VCDFGLAR.S	937.456	-0.336265	2	CID	3.05944e-05	1.94328	0.428769	824.149	1	13/14
	867, OB346_110529014318	K.SNDLALDLLEK.L	1230.66	-0.375654	2	CID	3.38595e-05	3.66396	0.360343	1555.41	1	17/20
	775, OB347_1	R.DLKPSNLLLNANCDLK.V	1827.96	-0.372436	2	CID	3.78741e-05	2.29484	0.210925	330.878	1	14/30
	502, OB347_1	K.RITVEEALR.H	1086.63	-0.160572	2	CID	4.36863e-05	3.22662	0.274252	1010.49	1	14/16
	1048, OB345	K.SNDLALDLLEK.L	1230.66	-0.384362	2	CID	5.24318e-05	3.50607	0.335406	1414.47	1	17/20
	877, OB347_1	K.ILIYEEIMR.-	1179.64	-0.381559	2	CID	5.83605e-05	2.7828	0.343477	1063.37	1	15/16
	607, OB344_110528225409	K.VCDFGLAR.S	937.456	-0.35427	2	CID	7.75838e-05	1.67454	0.434543	854.459	1	13/14
	887, OB344_110528225409	K.ILIYEEIMR.-	1179.64	-0.360504	2	CID	8.16354e-05	2.83183	0.323096	979.594	1	14/16
	602, OB347_1	K.VCDFGLAR.S	937.456	-0.26198	2	CID	0.000127201	2.03131	0.452091	769.696	1	13/14
	1022, OB346	R.ITVEEALR.H	930.525	-0.241051	2	CID	0.000157968	2.02015	0.371292	647.577	1	12/14
	1017, OB346	R.ITVEEALR.H	930.525	-0.404127	2	CID	0.000166062	2.15561	0.318281	651.47	1	12/14
	779, OB347_1	R.TQDLSDDHCQYFIYQTLR.A	2303.04	0.403208	3	CID	0.000203952	3.28954	0.341356	206.04	1	15/68
	867, OB344_110528225409	K.SNDLALDLLEK.L	1230.66	-0.37526	2	CID	0.000295012	2.76056	0.225026	1256.5	1	16/20
	507, OB347_1	K.RITVEEALR.H	1086.63	-0.148561	2	CID	0.000360511	3.45169	0.269903	1101.61	1	14/16
	1008, OB344	R.ITVEEALR.H	930.525	-0.0431545	2	CID	0.000405515	2.1288	0.352781	456.969	1	11/14
	612, OB347_1	R.ITVEEALR.H	930.525	-0.568535	2	CID	0.000408262	2.28007	0.297991	636.576	1	12/14
	862, OB347_1	K.SNDLALDLLEK.L	1230.66	-0.325308	2	CID	0.000431842	3.28803	0.307609	1203.04	1	16/20
	617, OB346_110529014318	R.ITVEEALR.H	930.525	-0.0713232	2	CID	0.000459044	2.37084	0.344502	668.27	1	12/14
	618, OB344_110528225409	R.ITVEEALR.H	930.525	-0.391391	2	CID	0.000459491	2.1198	0.377475	857.795	1	13/14
	513, OB346_110529014318	K.RITVEEALR.H	1086.63	-0.368783	2	CID	0.000573908	3.18496	0.18411	949.566	1	13/16
	623, OB344_110528225409	R.ITVEEALR.H	930.525	-0.308342	2	CID	0.000615711	2.35393	0.332817	832.221	1	13/14
	868, OB347_1	K.SNDLALDLLEK.L	1230.66	-0.415663	2	CID	0.000711322	2.93076	0.381329	997.169	1	15/20
	647, OB348	R.ITVEEALR.H	930.525	0.240078	2	CID	0.000722457	2.24279	0.387195	386.688	1	9/14
	947, OB345	R.ITVEEALR.H	930.525	-0.441485	2	CID	0.000983517	1.76763	0.403784	557.784	1	11/14
	1050, OB345	K.SNDLALDLLEK.L	1230.66	-0.0689856	1	CID	0.000987482	2.30392	0.322651	875.607	1	13/20
	612, OB346_110529014318	R.ITVEEALR.H	930.525	-0.58105	2	CID	0.00157294	1.60774	0.444861	746.987	1	13/14
	605, OB349	R.DLKPSNLLLNANCDLK.V	1827.96	-0.997797	3	CID	0.00161992	1.2122	0.112596	119.608	6	11/60
	643, OB347_1	K.LLAFNPTK.R	903.53	-0.0156693	1	CID	0.00186935	1.81577	0.332887	315.758	1	8/14
	1003, OB345	R.TQDLSDDHCQYFIYQTLR.A	2303.04	-0.687368	3	CID	0.00235175	1.76564	0.276743	162.718	2	13/68
	648, OB344_110528225409	K.LLAFNPTK.R	903.53	0.0106979	1	CID	0.00280056	1.99142	0.267409	481.979	1	9/14
	802, OB346_110529014318	R.APEIMLTFK.E	1049.57	-0.402919	2	CID	0.00286563	2.85777	0.326669	572.029	1	12/16
	953, OB345	R.ITVEEALR.H	930.525	-0.0193212	2	CID	0.00286891	1.88487	0.363358	366.001	1	9/14
	808, OB347_1	R.APEIMLTFK.E	1049.57	0.845749	2	CID	0.00476971	2.05213	0.322896	662.711	1	12/16
	619, OB344_110528225409	R.ITVEEALR.H	930.525	0.0308021	1	CID	0.00477863	1.89386	0.203023	146.882	2	7/14
	639, OB346_110529014318	K.LLAFNPTK.R	903.53	0.0192428	1	CID	0.00573277	2.12084	0.351551	493.377	1	9/14
	609, OB347_1	R.ITVEEALR.H	930.525	-0.505272	2	CID	0.0088374	2.42014	0.359806	716.867	1	12/14
	807, OB344_110528225409	R.APEIMLTFK.E	1049.57	-0.346644	2	CID	0.00927067	2.61251	0.398195	436.135	1	11/16
	769, OB347_1	R.DLKPSNLLLNANCDLK.V	1827.96	-0.181512	3	CID	0.00939008	2.45105	0.186667	381.009	1	15/60
	619, OB346_110529014318	R.ITVEEALR.H	930.525	1.02467	1	CID	0.0115018	2.02276	0.186937	199.214	1	8/14
	639, OB347_1	K.LLAFNPTK.R	903.53	-0.0037064	1	CID	0.0130409	1.60765	0.0801662	487.475	1	9/14
	969, OB345	K.LLAFNPTK.R	903.53	-0.158369	1	CID	0.0144368	1.69742	0.341706	434.943	1	8/14
	930, OB347_1	K.SNDLALDLLEK.L	1230.66	-0.120208	2	CID	0.0174621	1.17022	0.0775837	168.746	1	8/20
	1080, OB344	K.SNDLALDLLEK.L	1230.66	-0.366707	2	CID	0.0251182	2.82515	0.310412	742.83	1	13/20
	873, OB344_110528225409	K.SNDLALDLLEK.L	1230.66	-0.364195	2	CID	0.0271244	3.63635	0.325619	1027.23	1	15/20
	644, OB346_110529014318	K.LLAFNPTK.R	903.53	-0.159346	1	CID	0.0272798	1.42951	0.290839	393.658	1	8/14
	1483, OB345	K.SNDLALDLLEK.L	1230.66	-0.338225	2	CID	0.0303287	1.26865	0.0567825	234.002	1	9/20
2	AN7252 | Aspergillus nidulans (AN7252.3) conserved hypothetical protein (translation) (495 aa)						1.34001e-10	50.1906	12.6	54316	AN7252.3	27 (27 0 0 0 0)
	829, OB349	K.QYALYIVYGDQER.C	1617.79	-0.26701	2	CID	1.34001e-10	3.61435	0.614719	1475.58	1	19/24
	522, OB348	R.KQQQAPESTTAYPPSGGSAPNSAGFEPR.Q	2860.35	1.17939	3	CID	8.24708e-10	3.81178	0.53688	1066.02	1	36/108
	487, OB347	R.KQQQAPESTTAYPPSGGSAPNSAGFEPR.Q	2860.35	0.888249	3	CID	7.55944e-09	3.31857	0.416643	784.108	1	33/108
	548, OB349	R.KQQQAPESTTAYPPSGGSAPNSAGFEPR.Q	2860.35	1.16291	3	CID	2.21827e-08	3.71657	0.596035	512.235	1	30/108
	824, OB349	K.QYALYIVYGDQER.C	1617.79	-0.380665	2	CID	2.36921e-08	2.41528	0.54013	1206.29	1	17/24
	527, OB348	R.KQQQAPESTTAYPPSGGSAPNSAGFEPR.Q	2860.35	1.22443	3	CID	8.38145e-07	3.29404	0.413926	619.852	1	33/108
	702, OB348	R.AGGETPSVEIFK.S	1234.63	-0.334674	2	CID	3.11906e-06	2.38232	0.545102	592.168	1	15/22
	677, OB347_1	R.AGGETPSVEIFK.S	1234.63	-0.435829	2	CID	5.42756e-06	2.3968	0.387728	611.455	1	16/22
	499, OB347_1	R.KQQQAPESTTAYPPSGGSAPNSAGFEPR.Q	2860.35	1.11383	3	CID	7.93913e-06	2.74917	0.33543	556.834	1	31/108
	687, OB349	R.AGGETPSVEIFK.S	1234.63	0.313458	2	CID	8.48613e-06	2.49675	0.398789	417.871	1	14/22
	593, OB349	K.YNINGDWK.Q	1009.47	-0.338815	1	CID	1.46452e-05	2.08192	0.487559	794.972	1	11/14
	502, OB349	R.KQQQAPESTTAYPPSGGSAPNSAGFEPR.Q	2860.35	0.745426	3	CID	4.62036e-05	3.786	0.478374	777.147	1	32/108
	612, OB348	K.YNINGDWK.Q	1009.47	-0.267078	2	CID	4.68367e-05	2.72374	0.399092	1088.55	1	13/14
	597, OB349	K.YNINGDWK.Q	1009.47	-0.235747	2	CID	0.000179016	2.53874	0.269375	608.449	1	11/14
	692, OB349	R.AGGETPSVEIFK.S	1234.63	-0.490812	2	CID	0.000191462	1.541	0.314584	458.766	1	14/22
	694, OB349	R.AGGETPSVEIFK.S	1234.63	-0.0972143	1	CID	0.000286292	2.17704	0.353024	441.319	1	10/22
	674, OB347_1	R.AGGETPSVEIFK.S	1234.63	0.725099	2	CID	0.000293435	2.21236	0.517188	492.684	1	14/22
	598, OB349	K.YNINGDWK.Q	1009.47	-0.0116129	1	CID	0.000323433	1.74251	0.418893	792.629	1	11/14
	497, OB349	R.KQQQAPESTTAYPPSGGSAPNSAGFEPR.Q	2860.35	0.518009	3	CID	0.000482693	3.74314	0.522579	649.143	1	29/108
	713, OB348	R.AGGETPSVEIFK.S	1234.63	-0.0649877	1	CID	0.000683737	1.88487	0.402805	276.259	1	9/22
	553, OB349	R.KQQQAPESTTAYPPSGGSAPNSAGFEPR.Q	2860.35	0.887516	3	CID	0.00164613	3.34511	0.500676	466.78	1	27/108
	683, OB344_110528225409	R.AGGETPSVEIFK.S	1234.63	-0.179331	2	CID	0.00331158	2.94178	0.441866	518.631	1	14/22
	592, OB349	K.YNINGDWK.Q	1009.47	-0.308907	2	CID	0.004952	1.65117	0.230587	469.705	1	9/14
	700, OB349	R.AGGETPSVEIFK.S	1234.63	-0.0310521	1	CID	0.00732051	1.92107	0.3072	274.021	1	9/22
	619, OB348	K.YNINGDWK.Q	1009.47	-0.299284	2	CID	0.0100909	2.04573	0.370201	1000.88	1	13/14
	645, OB349	K.YNINGDWK.Q	1009.47	0.606823	2	CID	0.0118605	1.50566	0.0698421	508.562	1	10/14
	483, OB349	K.KYNINGDWK.Q	1137.57	0.11265	2	CID	0.0787402	1.77576	0.105812	350.366	1	10/16
	AnSte50 (SteD)::cTAP sexual stage identifications
	Reference						P (pro)	Score	Coverage	MW	Accession	Peptide (Hits)
	Scan(s), File	Peptide	MH+	DeltaM	z	Type	P (pep)	XC	DeltaCn	Sp	RSp	Ions
1	AN2269 | Aspergillus nidulans (AN2269.3) hypothetical protein similar to MAPKK kinase (translation) (887 aa)						7.77156e-14	190.275	29.8	97737.3	AN2269.3	89 (88 1 0 0 0)
	970, OB351	R.DAPPIPSIADTWLNNGTPPTR.A	2233.12	0.174033	2	CID	7.77156e-14	2.49091	0.5514	286.156	1	19/40
	670, OB350	R.HSLLDENASVAATDGGSFNER.L	2190.01	-0.231561	2	CID	4.70124e-11	5.49634	0.595563	1764.99	1	24/40
	519, OB352	R.QLAALEAAHQQASPDSAR.S	1863.93	-0.292186	2	CID	6.00753e-11	3.85356	0.69145	533.36	1	17/34
	673, OB350	R.HSLLDENASVAATDGGSFNER.L	2190.01	0.800157	2	CID	9.77463e-11	5.33646	0.599694	1253.18	1	21/40
	602, OB352	R.AAQLALDESQQAHMNALSSSNAR.N	2413.15	1.12278	3	CID	1.11418e-10	4.23475	0.668794	907.95	1	26/88
	657, OB353	K.SEFSEADDGLDAVR.S	1510.67	-0.392236	2	CID	4.79708e-10	3.08766	0.585766	1373.74	1	19/26
	598, OB350	R.DSIASSSLHPLQEESPVEPNRK.S	2420.21	1.02548	3	CID	6.18796e-10	3.29904	0.446991	807.687	1	29/84
	583, OB352	K.SYVSFDSGSDDPNNSR.H	1746.72	-0.266754	2	CID	1.05391e-09	3.10303	0.677639	892.104	1	17/30
	567, OB351	K.SYVSFDSGSDDPNNSR.H	1746.72	-0.251852	2	CID	2.93867e-09	3.07251	0.659179	1183.1	1	17/30
	653, OB353	K.SEFSEADDGLDAVR.S	1510.67	-0.286762	2	CID	3.91578e-09	2.82255	0.626985	1467.2	1	19/26
	662, OB355	K.SEFSEADDGLDAVR.S	1510.67	-0.195637	2	CID	4.04607e-09	3.4476	0.561373	1176.97	1	17/26
	624, OB353	R.LSVVSNTSYASSLR.D	1483.78	-0.456843	2	CID	4.68053e-09	3.24065	0.568777	987.582	1	16/26
	587, OB352	K.SYVSFDSGSDDPNNSR.H	1746.72	-0.264466	2	CID	9.0674e-09	2.80698	0.564262	1216.58	1	18/30
	667, OB351	K.SEFSEADDGLDAVR.S	1510.67	-0.352855	2	CID	2.49975e-08	2.28954	0.563945	1785.64	1	20/26
	574, OB351	K.SYVSFDSGSDDPNNSR.H	1746.72	-0.353943	2	CID	2.61276e-08	2.99014	0.445399	1347.26	1	19/30
	603, OB350	R.DSIASSSLHPLQEESPVEPNRK.S	2420.21	0.574673	3	CID	2.86464e-08	3.95476	0.60347	678.174	1	25/84
	485, OB353	R.QLAALEAAHQQASPDSAR.S	1863.93	0.952789	2	CID	3.45558e-08	3.90833	0.646171	424.141	1	14/34
	433, OB350	R.HNTTPSDHEIRPPQVSER.V	2100.02	1.17761	3	CID	3.76995e-08	2.85769	0.559124	289.245	1	16/68
	687, OB352	K.SEFSEADDGLDAVR.S	1510.67	-0.324174	2	CID	4.7211e-08	3.18249	0.590862	1740.15	1	21/26
	697, OB350	K.SEFSEADDGLDAVR.S	1510.67	-0.251649	2	CID	6.64966e-08	2.7399	0.61135	1342.56	1	19/26
	512, OB351	R.AAQLALDESQQAHM*NALSSSNAR.N	2429.15	1.11728	3	CID	6.68622e-08	3.73659	0.623571	650.899	1	23/88
	628, OB350	R.ANNFNGNNLIECDQK.I	1750.78	1.30044	2	CID	7.78559e-08	2.35795	0.188409	547.264	1	13/28
	568, OB351	R.DSIASSSLHPLQEESPVEPNRK.S	2420.21	0.639126	3	CID	9.5029e-08	3.81206	0.517644	953.055	1	28/84
	982, OB350	K.TPDEIILCVLK.K	1300.72	-0.277262	2	CID	1.17737e-07	3.59444	0.384262	1226.58	1	16/20
	514, OB355	K.SSTFSESQTGTVYTSPTK.S	1907.89	0.267982	2	CID	1.76002e-07	2.1455	0.622541	493.356	1	14/34
	978, OB350	K.TPDEIILCVLK.K	1300.72	-0.470692	2	CID	2.73851e-07	2.84878	0.307833	853.892	1	14/20
	483, OB353	R.QLAALEAAHQQASPDSAR.S	1863.93	0.401851	3	CID	2.95603e-07	2.71514	0.561969	278.424	1	18/68
	997, OB352	R.DAPPIPSIADTWLNNGTPPTR.A	2233.12	0.838701	2	CID	3.02089e-07	2.73309	0.551013	197.211	1	18/40
	547, OB350	R.AAQLALDESQQAHM*NALSSSNAR.N	2429.15	0.584807	3	CID	5.36357e-07	4.16371	0.652058	642.899	1	25/88
	660, OB355	K.SEFSEADDGLDAVR.S	1510.67	-0.352896	2	CID	5.49955e-07	2.46538	0.495824	1437.39	1	19/26
	983, OB352	K.TPDEIILCVLK.K	1300.72	-0.221465	2	CID	8.7852e-07	3.1601	0.473889	1406.63	1	17/20
	529, OB350	R.QLAALEAAHQQASPDSAR.S	1863.93	-0.10668	2	CID	9.3168e-07	4.3159	0.624761	565.179	1	17/34
	948, OB351	K.TPDEIILCVLK.K	1300.72	-0.313547	2	CID	1.00579e-06	3.19651	0.48732	1356.49	1	17/20
	937, OB353	K.TPDEIILCVLK.K	1300.72	-0.266221	2	CID	1.07594e-06	3.20281	0.396665	1275.12	1	16/20
	624, OB353	R.LSRAASRLSVVSNTSYASSLR.D	2225.2	0.163464	3	CID	1.14677e-06	2.64594	0.463536	275.342	1	15/80
	538, OB352	K.SSTFSESQTGTVYTSPTK.S	1907.89	0.220883	2	CID	1.27267e-06	3.32384	0.634161	960.14	1	17/34
	999, OB350	R.DAPPIPSIADTWLNNGTPPTR.A	2233.12	1.28498	2	CID	1.54823e-06	3.19446	0.596449	213.506	1	18/40
	703, OB350	K.SEFSEADDGLDAVR.S	1510.67	-0.108832	2	CID	1.61417e-06	3.04041	0.557211	1268.04	1	18/26
	632, OB351	R.LSVVSNTSYASSLR.D	1483.78	0.469578	2	CID	1.74408e-06	3.2306	0.573287	760.395	1	15/26
	562, OB353	R.ANNFNGNNLIECDQK.I	1750.78	-0.204742	2	CID	2.36655e-06	3.12527	0.487741	682.135	1	15/28
	478, OB353	R.QLAALEAAHQQASPDSAR.S	1863.93	0.549235	2	CID	2.64e-06	3.47228	0.614283	623.886	1	18/34
	684, OB352	K.SEFSEADDGLDAVR.S	1510.67	-0.152528	2	CID	2.66767e-06	3.19352	0.493279	1254.62	1	18/26
	575, OB351	R.DSIASSSLHPLQEESPVEPNRK.S	2420.21	0.63107	3	CID	2.9208e-06	3.55268	0.495153	268.496	1	19/84
	463, OB350	K.KLQLPEHQYR.N	1311.72	-0.123424	2	CID	4.3487e-06	3.2637	0.340579	684.406	1	15/18
	978, OB352	K.TPDEIILCVLK.K	1300.72	0.770193	2	CID	4.7493e-06	2.9601	0.444931	1095.06	1	15/20
	599, OB350	K.SYVSFDSGSDDPNNSR.H	1746.72	-0.267273	2	CID	5.15334e-06	3.08337	0.631887	1133.13	1	18/30
	534, OB350	R.QLAALEAAHQQASPDSAR.S	1863.93	0.125193	2	CID	6.03138e-06	4.40401	0.681482	562.256	1	18/34
	942, OB353	K.TPDEIILCVLK.K	1300.72	-0.404648	2	CID	9.53223e-06	3.53221	0.487992	1564.75	1	18/20
	607, OB352	R.AAQLALDESQQAHMNALSSSNAR.N	2413.15	0.24827	3	CID	1.06672e-05	2.1582	0.357819	267.125	1	17/88
	620, OB350	R.AAQLALDESQQAHMNALSSSNAR.N	2413.15	0.323343	3	CID	1.35209e-05	2.37916	0.380745	306.178	1	18/88
	554, OB353	K.SYVSFDSGSDDPNNSR.H	1746.72	-0.323263	2	CID	1.77779e-05	2.58017	0.54349	876.093	1	15/30
	672, OB350	R.LSVVSNTSYASSLR.D	1483.78	-0.528142	2	CID	1.8959e-05	2.77383	0.445292	933.19	1	15/26
	600, OB351	R.ANNFNGNNLIECDQK.I	1750.78	0.833131	2	CID	2.73363e-05	3.01941	0.381545	415.87	1	12/28
	500, OB351	R.QLAALEAAHQQASPDSAR.S	1863.93	0.932857	3	CID	2.90974e-05	2.1752	0.425541	317.68	1	18/68
	583, OB353	R.ANNFNGNNLIECDQK.I	1750.78	1.44299	2	CID	3.12351e-05	1.92684	0.239721	335.673	1	11/28
	655, OB352	R.LSVVSNTSYASSLR.D	1483.78	-0.218043	2	CID	5.02959e-05	3.73972	0.509978	616.163	1	13/26
	667, OB350	R.LSVVSNTSYASSLR.D	1483.78	-0.318405	2	CID	5.79917e-05	4.1045	0.584993	950.588	1	16/26
	624, OB350	K.IQQLTGESWHNIR.Q	1581.81	-0.353287	2	CID	6.03648e-05	3.75197	0.526558	929.759	1	15/24
	578, OB351	R.ANNFNGNNLIECDQK.I	1750.78	-0.345702	2	CID	6.31772e-05	2.58944	0.485813	554.929	1	14/28
	470, OB350	K.KLQLPEHQYR.N	1311.72	1.04813	3	CID	8.59268e-05	4.13177	0.434615	707.249	1	18/36
	532, OB352	R.AAQLALDESQQAHM*NALSSSNAR.N	2429.15	0.771209	3	CID	8.97071e-05	4.60313	0.639683	689.469	1	24/88
	479, OB353	R.QLAALEAAHQQASPDSAR.S	1863.93	0.611324	3	CID	9.2459e-05	2.84671	0.627689	288.156	1	18/68
	520, OB350	K.LQLPEHQYR.N	1183.62	-0.242862	2	CID	0.00015699	2.3354	0.278796	342.151	1	10/16
	588, OB353	R.ANNFNGNNLIECDQK.I	1750.78	0.788158	2	CID	0.000163852	2.19805	0.427559	435.223	1	13/28
	637, OB351	R.LSVVSNTSYASSLR.D	1483.78	1.24399	2	CID	0.000166927	4.0489	0.499485	917.807	1	16/26
	962, OB351	R.DAPPIPSIADTWLNNGTPPTR.A	2233.12	0.733345	2	CID	0.000174008	2.54955	0.550142	196.939	1	16/40
	477, OB351	K.LQLPEHQYR.N	1183.62	-0.283565	2	CID	0.000197804	2.3792	0.351049	496.273	1	12/16
	657, OB352	R.LSVVSNTSYASSLR.D	1483.78	-0.107386	2	CID	0.000212996	3.1502	0.550711	862.722	1	16/26
	535, OB350	R.QLAALEAAHQQASPDSAR.S	1863.93	1.40893	3	CID	0.000248637	2.88885	0.483525	429.959	1	21/68
	709, OB351	R.LSDHELMEICEGFHR.S	1872.84	0.61084	3	CID	0.000362972	3.64471	0.467448	898.444	1	20/56
	620, OB352	R.ANNFNGNNLIECDQK.I	1750.78	0.734632	2	CID	0.000411589	2.76384	0.334743	455.306	1	12/28
	437, OB350	R.HNTTPSDHEIRPPQVSER.V	2100.02	0.454709	3	CID	0.000445826	3.20242	0.601123	308.96	1	17/68
	655, OB352	R.LSRAASRLSVVSNTSYASSLR.D	2225.2	0.165295	3	CID	0.000795955	2.22883	0.289119	213.339	1	14/80
	467, OB350	K.KLQLPEHQYR.N	1311.72	-0.18806	2	CID	0.000936452	3.44347	0.358862	513.071	1	13/18
	672, OB350	R.LSRAASRLSVVSNTSYASSLR.D	2225.2	0.153942	3	CID	0.000954889	2.04385	0.204943	156.7	1	11/80
	632, OB351	R.LSRAASRLSVVSNTSYASSLR.D	2225.2	0.663708	3	CID	0.000994515	2.70069	0.320529	149.412	1	12/80
	997, OB350	R.DAPPIPSIADTWLNNGTPPTR.A	2233.12	0.878375	3	CID	0.00112915	2.99399	0.614326	462.522	1	21/80
	483, OB351	K.LQLPEHQYR.N	1183.62	0.726165	2	CID	0.00124627	1.99245	0.168134	335.642	1	10/16
	578, OB353	K.ILQEMGIK.K	931.528	-0.455213	2	CID	0.00130021	2.7874	0.21214	629.213	1	13/14
	667, OB350	R.LSRAASRLSVVSNTSYASSLR.D	2225.2	0.554943	3	CID	0.00199621	2.84734	0.370356	246.208	1	15/80
	657, OB352	R.LSRAASRLSVVSNTSYASSLR.D	2225.2	0.637341	3	CID	0.00200431	2.41743	0.389666	190.04	1	14/80
	633, OB350	K.ILQEMGIK.K	931.528	-0.394542	2	CID	0.00210027	2.51711	0.0799117	610.461	1	13/14
	414, OB350	R.HNTTPSDHEIRPPQVSER.V	2100.02	0.110471	3	CID	0.00214581	1.41985	0.0174027	236.969	1	14/68
	438, OB350	R.HNTTPSDHEIRPPQVSER.V	2100.02	-0.00755643	2	CID	0.0050949	2.21825	0.332418	226.164	1	10/34
	619, OB352	K.ILQEMGIK.K	931.528	0.257455	2	CID	0.006962	1.84005	0.140056	389.956	1	11/14
	968, OB351	R.DAPPIPSIADTWLNNGTPPTR.A	2233.12	0.712115	3	CID	0.00942763	2.99022	0.498452	719.512	1	26/80
	488, OB352	K.LQLPEHQYR.N	1183.62	-0.285266	2	CID	0.0287302	2.12317	0.208309	552.093	1	12/16
	423, OB353	K.KLQLPEHQYR.N	1311.72	-0.14004	3	CID	0.0315492	3.34475	0.37476	974.654	1	21/36
	459, OB352	K.KLQLPEHQYR.N	1311.72	0.435404	2	CID	0.0772442	2.22207	0.303829	266.47	1	9/18
2	AN3719 | Aspergillus nidulans (AN3719.3) mitogen-activated protein kinase (translation) (355 aa)						1.25455e-13	118.187	31.1	40971.9	AN3719.3	52 (51 1 0 0 0)
	742, OB352	R.SAASTDDNSGFMTEYVATR.W	2022.87	-0.287365	2	CID	1.25455e-13	3.6362	0.582616	1648.81	1	22/36
	722, OB351	R.SAASTDDNSGFMTEYVATR.W	2022.87	-0.451077	2	CID	3.20854e-13	2.57173	0.622297	1119.19	1	18/36
	803, OB352	R.TQDLSDDHCQYFIYQTLR.A	2303.04	0.37181	2	CID	8.29337e-13	3.18826	0.59138	822.193	1	18/34
	793, OB352	R.DLKPSNLLLNANCDLK.V	1827.96	0.221507	2	CID	1.91624e-12	2.90509	0.517727	656.498	1	17/30
	775, OB351	R.TQDLSDDHCQYFIYQTLR.A	2303.04	-0.378729	2	CID	4.63629e-12	3.46651	0.551799	801.516	1	17/34
	717, OB351	R.SAASTDDNSGFMTEYVATR.W	2022.87	0.0086246	2	CID	2.58926e-11	3.07541	0.698013	1380.56	1	20/36
	752, OB350	R.SAASTDDNSGFMTEYVATR.W	2022.87	0.15135	2	CID	3.84389e-10	2.67131	0.585052	1683.64	1	20/36
	747, OB350	R.SAASTDDNSGFMTEYVATR.W	2022.87	-0.0816108	2	CID	5.74518e-10	3.37199	0.704621	875.323	1	17/36
	713, OB353	R.SAASTDDNSGFMTEYVATR.W	2022.87	0.583468	2	CID	1.60335e-09	3.08517	0.61781	1146.17	1	18/36
	583, OB351	R.SAASTDDNSGFM*TEYVATR.W	2038.87	-0.273719	2	CID	2.04672e-09	3.10487	0.683611	1035.14	1	17/36
	809, OB350	R.TQDLSDDHCQYFIYQTLR.A	2303.04	-0.354575	2	CID	2.59701e-09	3.43702	0.590735	974.27	1	16/34
	709, OB353	R.SAASTDDNSGFMTEYVATR.W	2022.87	0.32171	2	CID	3.03142e-09	3.3506	0.661682	1349.97	1	19/36
	737, OB352	R.SAASTDDNSGFMTEYVATR.W	2022.87	-0.323452	2	CID	8.02535e-08	3.14286	0.688129	1368.62	1	19/36
	773, OB351	R.TQDLSDDHCQYFIYQTLR.A	2303.04	0.43397	3	CID	3.00513e-07	3.51297	0.527089	586.985	1	23/68
	613, OB350	R.SAASTDDNSGFM*TEYVATR.W	2038.87	-0.547775	2	CID	9.71083e-07	3.02308	0.684922	735.017	1	17/36
	609, OB350	R.SAASTDDNSGFM*TEYVATR.W	2038.87	0.0577933	2	CID	1.84473e-06	2.78909	0.626338	1055.68	1	19/36
	569, OB353	R.SAASTDDNSGFM*TEYVATR.W	2038.87	-0.377336	2	CID	3.06662e-06	2.74365	0.529105	957.322	1	18/36
	897, OB350	K.SNDLALDLLEK.L	1230.66	-0.399849	2	CID	5.83322e-06	3.55106	0.364806	1035.73	1	15/20
	920, OB350	K.ILIYEEIMR.-	1179.64	-0.312591	2	CID	9.9738e-06	2.9095	0.301038	903.937	1	14/16
	887, OB352	K.SNDLALDLLEK.L	1230.66	-0.310252	2	CID	1.00643e-05	3.70211	0.341394	1450.53	1	17/20
	885, OB351	K.ILIYEEIMR.-	1179.64	-0.375421	2	CID	1.17198e-05	2.09252	0.363127	918.78	1	14/16
	907, OB352	K.ILIYEEIMR.-	1179.64	-0.353224	2	CID	1.4195e-05	3.08689	0.455605	883.681	1	14/16
	914, OB352	K.ILIYEEIMR.-	1179.64	-0.293481	2	CID	1.58661e-05	2.66677	0.276428	1138.99	1	15/16
	904, OB350	K.SNDLALDLLEK.L	1230.66	-0.413957	2	CID	2.85722e-05	3.15047	0.375916	1254.59	1	16/20
	507, OB351	K.RITVEEALR.H	1086.63	-0.252511	2	CID	3.63772e-05	3.56268	0.205688	892.493	1	12/16
	878, OB351	K.ILIYEEIMR.-	1179.64	-0.350099	2	CID	3.70025e-05	2.61119	0.38017	1015.78	1	15/16
	758, OB353	R.DLKPSNLLLNANCDLK.V	1827.96	0.867024	2	CID	5.16313e-05	2.82588	0.437765	444.246	1	14/30
	637, OB350	K.VCDFGLAR.S	937.456	-0.30619	2	CID	8.78231e-05	1.96511	0.357589	785.768	1	13/14
	843, OB350	R.APEIMLTFK.E	1049.57	0.382042	2	CID	0.000113491	1.80649	0.338767	497.143	1	11/16
	534, OB352	K.RITVEEALR.H	1086.63	-0.237582	2	CID	0.000114029	3.46234	0.175134	1653.41	1	16/16
	857, OB353	K.SNDLALDLLEK.L	1230.66	-0.38545	2	CID	0.00017011	2.56472	0.189322	1047.33	1	15/20
	803, OB350	R.DLKPSNLLLNANCDLK.V	1827.96	-0.34434	2	CID	0.000170329	2.85944	0.292669	348.885	1	13/30
	605, OB353	R.ITVEEALR.H	930.525	-0.0953014	2	CID	0.0002366	2.45398	0.306038	514.403	1	11/14
	653, OB350	R.ITVEEALR.H	930.525	-0.397596	2	CID	0.0002366	2.22554	0.284229	786.298	1	13/14
	809, OB351	R.APEIMLTFK.E	1049.57	-0.305944	2	CID	0.000425524	2.13994	0.303801	460.929	1	11/16
	862, OB353	K.SNDLALDLLEK.L	1230.66	-0.363639	2	CID	0.000474283	3.43541	0.334321	1232.77	1	16/20
	608, OB353	R.ITVEEALR.H	930.525	0.827644	2	CID	0.000601738	2.65534	0.317948	760.602	1	13/14
	892, OB352	K.SNDLALDLLEK.L	1230.66	-0.0357238	2	CID	0.000622544	2.72321	0.345787	1036.44	1	15/20
	622, OB351	R.ITVEEALR.H	930.525	0.109341	2	CID	0.000831423	2.56159	0.240739	585.691	1	12/14
	617, OB351	R.ITVEEALR.H	930.525	-0.238518	2	CID	0.0008846	2.03196	0.406336	653.991	1	12/14
	803, OB353	R.APEIMLTFK.E	1049.57	0.0453022	2	CID	0.00133313	2.32469	0.436287	625.379	1	12/16
	867, OB351	K.SNDLALDLLEK.L	1230.66	-0.311833	2	CID	0.00183142	3.74068	0.302388	1030.32	1	15/20
	839, OB352	R.APEIMLTFK.E	1049.57	-0.382553	2	CID	0.00206385	1.73147	0.327271	341.773	1	10/16
	863, OB351	K.SNDLALDLLEK.L	1230.66	-0.361357	2	CID	0.00269119	2.88001	0.410266	914.626	1	14/20
	765, OB353	R.DLKPSNLLLNANCDLK.V	1827.96	1.43856	2	CID	0.00275231	2.27038	0.194711	363.657	1	11/30
	630, OB353	K.LLAFNPTK.R	903.53	-0.363379	2	CID	0.00403461	2.14472	0.311963	448.792	1	12/14
	668, OB352	K.LLAFNPTK.R	903.53	-0.0699906	1	CID	0.00457151	2.22784	0.312866	481.185	1	9/14
	779, OB351	R.DLKPSNLLLNANCDLK.V	1827.96	1.31014	2	CID	0.0330557	1.93551	0.240134	174.137	1	9/30
	624, OB351	R.ITVEEALR.H	930.525	0.0104163	1	CID	0.0387386	2.11238	0.25518	180.75	1	8/14
	1100, OB351	R.WYRAPEIM*LTFK.E	1570.81	-0.0183245	2	CID	0.0426167	1.4382	0.147395	47.3206	41	4/22
	804, OB352	R.TQDLSDDHCQYFIYQTLR.A	2303.04	1.01625	3	CID	0.0807465	2.70317	0.390865	254.66	1	15/68
	1085, OB352	R.WYRAPEIM*LTFK.E	1570.81	-0.444635	2	CID	0.0847877	1.79922	0.0130697	78.0618	27	5/22
3	AN7252 | Aspergillus nidulans (AN7252.3) conserved hypothetical protein (translation) (495 aa)						4.00047e-11	100.231	31	54316	AN7252.3	54 (53 0 0 1 0)
	607, OB353	K.SQPLPPPTAVSSSDGYYDDR.L	2151.98	-0.320272	2	CID	4.00047e-11	2.17612	0.689759	345.142	1	21/38
	502, OB351	R.KQQQAPESTTAYPPSGGSAPNSAGFEPR.Q	2860.35	0.401554	3	CID	9.43678e-11	3.54604	0.501923	1127.87	1	38/108
	658, OB351	K.SQPLPPPTAVSSSDGYYDDR.L	2151.98	0.702697	2	CID	1.58087e-10	1.53777	0.251948	267.827	1	18/38
	637, OB352	K.SQPLPPPTAVSSSDGYYDDR.L	2151.98	-0.473064	2	CID	3.51498e-10	1.71599	0.329435	329.102	1	20/38
	632, OB352	K.SQPLPPPTAVSSSDGYYDDR.L	2151.98	-0.300314	2	CID	4.03232e-10	2.95705	0.545569	493.605	1	23/38
	603, OB353	K.SQPLPPPTAVSSSDGYYDDR.L	2151.98	-0.376221	2	CID	6.26456e-10	2.28878	0.622734	182.91	1	17/38
	743, OB351	R.LSGSTLTGQQSGITILDR.S	1846.99	-0.278113	2	CID	1.2873e-09	4.3668	0.589981	1461.89	1	20/34
	655, OB350	K.SQPLPPPTAVSSSDGYYDDR.L	2151.98	-0.252316	2	CID	4.97614e-08	1.95528	0.499138	191.293	1	15/38
	498, OB351	R.KQQQAPESTTAYPPSGGSAPNSAGFEPR.Q	2860.35	0.164616	3	CID	6.96316e-08	4.12303	0.578398	967.365	1	38/108
	703, OB352	R.AGGETPSVEIFK.S	1234.63	-0.291115	2	CID	2.5422e-07	2.54941	0.420148	633.931	1	15/22
	487, OB353	R.KQQQAPESTTAYPPSGGSAPNSAGFEPR.Q	2860.35	0.867008	3	CID	2.55371e-07	4.62551	0.592053	540.313	1	32/108
	615, OB351	K.SQPLPPPTAVSSSDGYYDDR.L	2151.98	-0.102336	2	CID	3.51965e-07	1.97763	0.479	437.062	1	21/38
	682, OB351	R.AGGETPSVEIFK.S	1234.63	-0.36717	2	CID	5.31972e-07	2.84887	0.50727	648.327	1	16/22
	735, OB353	R.LSGSTLTGQQSGITILDR.S	1846.99	-0.212871	2	CID	7.45828e-07	4.0935	0.563288	726.435	1	17/34
	380, OB351	K.NNSPTHIPPSIHENR.A	1712.85	1.28123	3	CID	8.33514e-07	3.69311	0.527507	631.95	1	20/56
	667, OB353	R.AGGETPSVEIFK.S	1234.63	-0.326861	2	CID	1.00252e-06	3.23162	0.461844	650.18	1	16/22
	779, OB352	R.LSGSTLTGQQSGITILDR.S	1846.99	-0.63437	2	CID	1.9607e-06	4.13211	0.5003	1502.24	1	21/34
	675, OB355	R.AGGETPSVEIFK.S	1234.63	-0.220619	2	CID	2.46251e-06	3.07457	0.517778	510.469	1	14/22
	717, OB350	R.AGGETPSVEIFK.S	1234.63	0.00619731	2	CID	3.31036e-06	2.60262	0.485506	634.175	1	16/22
	737, OB353	R.LSGSTLTGQQSGITILDR.S	1846.99	0.476057	2	CID	5.88155e-06	4.03764	0.503676	896.321	1	18/34
	747, OB351	R.LSGSTLTGQQSGITILDR.S	1846.99	0.503156	2	CID	6.75822e-06	3.95365	0.530148	915.584	1	17/34
	712, OB350	R.AGGETPSVEIFK.S	1234.63	-0.202604	2	CID	1.07336e-05	2.26408	0.38891	469.864	1	14/22
	677, OB351	R.AGGETPSVEIFK.S	1234.63	0.672162	2	CID	1.11308e-05	2.77731	0.473657	549.507	1	15/22
	649, OB350	K.SQPLPPPTAVSSSDGYYDDR.L	2151.98	-0.465251	2	CID	1.19448e-05	1.11634	0.179562	88.4491	1	12/38
	774, OB352	R.LSGSTLTGQQSGITILDR.S	1846.99	-0.286699	2	CID	1.50751e-05	4.36263	0.495779	669.262	1	15/34
	633, OB351	K.IMTVETELR.R	1091.58	0.0626861	2	CID	1.60595e-05	2.17493	0.349907	488.648	1	13/16
	673, OB351	R.AYNDGTNLDPSAAAVAASSHLSTM*NGK.S	2679.24	0.675488	3	CID	3.13605e-05	1.52421	0.0951814	371.544	1	22/104
	533, OB350	R.KQQQAPESTTAYPPSGGSAPNSAGFEPR.Q	2860.35	0.416203	3	CID	3.57541e-05	3.48352	0.494702	534.062	1	31/108
	648, OB352	K.IMTVETELR.R	1091.58	-0.262813	2	CID	3.73056e-05	2.56161	0.271294	390.21	1	11/16
	707, OB352	R.AGGETPSVEIFK.S	1234.63	-0.335462	2	CID	3.7606e-05	2.42244	0.398922	629.482	1	15/22
	484, OB353	R.KQQQAPESTTAYPPSGGSAPNSAGFEPR.Q	2860.35	0.882389	3	CID	3.81875e-05	3.94452	0.485399	683.631	1	28/108
	750, OB351	R.LREELLPVFK.M	1243.74	-0.233024	2	CID	8.02616e-05	3.0282	0.473382	700.716	1	13/18
	575, OB353	K.YNINGDWK.Q	1009.47	-0.386158	1	CID	0.00025589	1.43205	0.27398	549.299	1	9/14
	783, OB352	R.LREELLPVFK.M	1243.74	-0.142265	2	CID	0.000354026	2.96087	0.339186	573.439	1	12/18
	588, OB351	K.YNINGDWK.Q	1009.47	-0.286589	2	CID	0.000479792	2.4508	0.311677	599.454	1	11/14
	678, OB351	R.AYNDGTNLDPSAAAVAASSHLSTM*NGK.S	2679.24	1.3127	3	CID	0.000591062	1.3508	0.173079	170.272	1	15/104
	652, OB352	K.IMTVETELR.R	1091.58	0.217471	2	CID	0.000844881	2.32547	0.406349	423.083	1	12/16
	627, OB351	K.IMTVETELR.R	1091.58	0.280704	2	CID	0.00108113	2.3096	0.277727	618.154	1	13/16
	683, OB351	R.AGGETPSVEIFK.S	1234.63	-0.217331	1	CID	0.00153182	2.03688	0.370952	357.055	1	10/22
	538, OB350	R.KQQQAPESTTAYPPSGGSAPNSAGFEPR.Q	2860.35	0.62421	3	CID	0.00309269	2.89932	0.332351	491.216	1	28/108
	579, OB353	K.YNINGDWK.Q	1009.47	-0.27959	2	CID	0.00435013	2.34419	0.292291	677.662	1	10/14
	593, OB351	K.YNINGDWK.Q	1009.47	-0.373747	2	CID	0.00591588	2.57374	0.324468	661.232	1	11/14
	794, OB351	R.PLILFK.Q	730.486	-0.314891	2	CID	0.0100021	2.62691	0.169271	557.305	1	9/10
	663, OB353	R.AGGETPSVEIFK.S	1234.63	0.143435	2	CID	0.0112044	1.99815	0.5179	474.842	1	14/22
	612, OB353	K.IMTVETELR.R	1091.58	-0.406745	2	CID	0.0129703	2.1391	0.261687	353.682	1	11/16
	662, OB350	K.IMTVETELR.R	1091.58	1.15644	2	CID	0.0151684	2.40186	0.178473	393.645	1	11/16
	687, OB351	R.AGGETPSVEIFK.S	1234.63	-0.0708138	1	CID	0.0182043	2.50029	0.516077	641.33	1	12/22
	785, OB353	R.PLILFK.Q	730.486	-0.38203	2	CID	0.020765	2.55078	0.227532	561.476	1	9/10
	617, OB353	K.IMTVETELR.R	1091.58	-0.546891	2	CID	0.0245474	1.87082	0.273753	362.308	1	11/16
	788, OB351	R.PLILFK.Q	730.486	-0.385555	2	CID	0.0267075	2.25217	0.190154	560.989	1	9/10
	412, OB350	K.NNSPTHIPPSIHENR.A	1712.85	0.531963	3	CID	0.0292648	3.80768	0.560968	755.612	1	22/56
	599, OB355	K.YNINGDWK.Q	1009.47	0.731137	2	CID	0.0588015	1.92801	0.208101	851.625	1	12/14
	573, OB353	K.YNINGDWK.Q	1009.47	-0.31436	2	CID	0.0703342	2.06376	0.266491	527.081	1	10/14
	714, OB352	R.AGGETPSVEIFK.S	1234.63	0.803176	1	CID	0.0911609	1.92572	0.308788	203.635	1	8/22
